# Supplementary material for: Effects of global and domestic tobacco control policies on cigarette consumption per capita: an evaluation using monthly data in China
Source: PubMed Central journal article supplement (PMC6588959; doi:10.1136/bmjopen-2018-025092), 2019-06-19
Supplement: bmjopen-2018-025092.draft_revisions.pdf [file bmjopen-2018-025092.draft_revisions.pdf]

# BMJ Open

BMJ Open is committed to open peer review. As part of this commitment we make the peer review history of every article we publish publicly available.

When an article is published we post the peer reviewers' comments and the authors' responses online. We also post the versions of the paper that were used during peer review. These are the versions that the peer review comments apply to.

The versions of the paper that follow are the versions that were submitted during the peer review process. They are not the versions of record or the final published versions. They should not be cited or distributed as the published version of this manuscript.

BMJ Open is an open access journal and the full, final, typeset and author-corrected version of record of the manuscript is available on our site with no access controls, subscription charges or pay-per-view fees (<http://bmjopen.bmj.com>).

If you have any questions on BMJ Open's open peer review process please email [info.bmjopen@bmj.com](mailto:info.bmjopen@bmj.com)

# BMJ Open

## Global and Domestic Tobacco Control Policies Combined Have Halted the Growing Trend of Cigarette Consumption in China: Findings from 17 Years of Monthly Data

|                               |                                                                                                                                                                                                                                                                                                                                                                                                                                       |
|-------------------------------|---------------------------------------------------------------------------------------------------------------------------------------------------------------------------------------------------------------------------------------------------------------------------------------------------------------------------------------------------------------------------------------------------------------------------------------|
| Journal:                      | <i>BMJ Open</i>                                                                                                                                                                                                                                                                                                                                                                                                                       |
| Manuscript ID                 | bmjopen-2018-025092                                                                                                                                                                                                                                                                                                                                                                                                                   |
| Article Type:                 | Research                                                                                                                                                                                                                                                                                                                                                                                                                              |
| Date Submitted by the Author: | 08-Jul-2018                                                                                                                                                                                                                                                                                                                                                                                                                           |
| Complete List of Authors:     | Xu, Xiaoxin; Beijing Normal University, School of Social Development and Public Policy<br>Zhang, Xiulan; Beijing Normal University, School of Social Development and Public Policy<br>Hu, Teh-wei; Public Health Institute, Center for International Tobacco Control<br>Miller, Leonard; University of California, School of Social Welfare<br>XU, Mengnan; Beijing Normal University, School of Social Development and Public Policy |
| Keywords:                     | global health, smoking, global and domestic health policies                                                                                                                                                                                                                                                                                                                                                                           |
|                               |                                                                                                                                                                                                                                                                                                                                                                                                                                       |

SCHOLARONE™  
Manuscripts

1  
2  
3 **Global and Domestic Tobacco Control Policies Combined Have**  
4  
5  
6 **Halted the Growing Trend of Cigarette Consumption in China:**  
7  
8 **Findings from 17 Years of Monthly Data Word Count: 3338**  
9

10 Xu Xiaoxin, Xiulan Zhang, Teh-wei Hu, Leonard Miller, Mengnan Xu

14  
15 **Authors**

16 Xiaoxin Xu, Ph.D.,  
17  
18 School of Social Development and Public Policy  
19  
20 Beijing Normal University, China  
21  
22 Email: [xuxiaoxin@bnu.edu.cn](mailto:xuxiaoxin@bnu.edu.cn)  
23  
24  
25

26 Xiulan Zhang, Ph.D.,  
27  
28 School of Social Development and Public Policy  
29  
30 Beijing Normal University, China  
31  
32 Email: [zhang99@bnu.edu.cn](mailto:zhang99@bnu.edu.cn)  
33  
34  
35

36 Teh-wei Hu, Ph.D.,  
37  
38 Center for International Tobacco Control,  
39  
40 Public Health Institute, Oakland, CA, USA  
41  
42 Email: [thu@berkeley.edu](mailto:thu@berkeley.edu)  
43  
44  
45

46 Leonard S. Miller, Ph.D.,  
47  
48 School of Social Welfare  
49  
50 University of California, Berkeley, CA, USA  
51  
52 Email: [lsmiller2331@gmail.com](mailto:lsmiller2331@gmail.com)  
53  
54  
55

56 Mengnan Xu, B.S.,  
57  
58  
59  
60

1  
2  
3 School of Social Development and Public Policy,  
4  
5 Beijing Normal University, China  
6  
7 Email: pumpkinggg@126.com  
8  
9

10 Correspondence: Xiulan Zhang, School of Social Development and Public Policy,  
11  
12 Beijing Normal University, Beijing, China, 19 Xijiekouwai Street, Haidian District,  
13  
14 Beijing, 100875, China. Tel: (86-10) 5880-1512; Fax: (86-10) 5880-0366; Email:  
15  
16 zhang99@bnu.edu.cn  
17  
18  
19  
20  
21  
22  
23  
24  
25  
26  
27  
28  
29  
30  
31  
32  
33  
34  
35  
36  
37  
38  
39  
40  
41  
42  
43  
44  
45  
46  
47  
48  
49  
50  
51  
52  
53  
54  
55  
56  
57  
58  
59  
60

## Abstract

**Introduction** China consumes 44% of the world's cigarettes. Robust tobacco control policies are needed to stop the continuing trend of increased cigarette consumption.

**Methods** Monthly data on cigarette consumption per capita from January 2000 to June 2017, a period of 17.5 years or 210 months, are used to estimate the impact of specific policies on China's tobacco consumption. The policies studied include the World Health Organization's (WHO) Framework Convention on Tobacco Control (FCTC), national tobacco-related policy changes, and two tobacco tax increases implemented in China during the study period. Segmented regression analysis is used to estimate the immediate effect of the policies studied and changes in the time trends resulting from these policy changes.

**Findings** The impact of national policy changes in China is almost 20 times greater than the impact of the WHO's FCTC treaty itself, and national policy changes in tobacco control are a determining factor in reversing the trend of increased tobacco consumption in China. The 2015 tax increase, which raised retail cigarette prices, produced both immediate and trend effects, with a total marginal effect 7.8 times that of the 2009 tax increase, which did not result in higher cigarette prices for the consumer.

**Interpretations** Translating global social norms of tobacco control into national policies will generate much higher impact on average cigarette consumption, and tobacco taxes that are reflected in the retail prices will be more effective in reducing the consumption of cigarettes.

## Strengths and limitations of this study

1. To the best of our knowledge, this study is the first systematic evaluation of the impact of

1  
2  
3 both domestic and global tobacco control policies on tobacco consumption in China.  
4  
5

- 6 2. The study compares the effectiveness of the global FCTC and domestic policies to reduce  
7  
8 cigarette consumption in China over a period 17·5 years.  
9  
10  
11 3. The data used for the policy evaluation covers the periods from no tobacco control policies in  
12  
13 China to the implementation of FCTC policies to the changed national policies to the specific  
14  
15 tax increases enacted in China in 2009 and 2015.  
16  
17  
18 4. Using the interrupted time series model, the study not only examines the immediate impact of  
19  
20 each policy on tobacco consumption, but also the policy impact on tobacco consumption  
21  
22 trends.  
23  
24  
25  
26  
27  
28  
29  
30  
31  
32  
33  
34  
35  
36  
37  
38  
39  
40  
41  
42  
43  
44  
45  
46  
47  
48  
49  
50  
51  
52  
53  
54  
55  
56  
57  
58  
59  
60

## Introduction

The 315 million smokers in China consume 44% of the world's cigarettes, and their average consumption is 2·3 times the world average.<sup>1</sup> Tobacco use increases medical expenses by billions.<sup>1</sup> Each year, one million people in China, many of them young, die of tobacco-related diseases.<sup>2</sup> China's rapid economic development in the past 40 years has been accompanied by significant growth in the country's total cigarette consumption. In 2000, the China National Tobacco Corporation (CNTC), the state-owned tobacco monopoly, sold 76·92 billion packs of cigarettes;<sup>3</sup> by 2014, the number had grown to 127·48 billion packs,<sup>4</sup> an increase of 65·8 %.

China signed the World Health Organization's (WHO) Framework Convention on Tobacco Control (FCTC) in 2003; the China National People's Congress (CNPC) ratified the treaty in 2005, and China began implementing the FCTC in 2006. In this paper, however, we refer to the WHO framework as an international policy. While the Chinese government has made some effort to control tobacco use, strong interference from the China State Tobacco Monopoly Administration (STMA), which owns CNTC, in favoring economic concerns over social concerns has led to slow development and implementation of the full tobacco control policy measures.<sup>5-10</sup>

Between 2006 and 2015, China increased tobacco taxes twice. The first tax increase was introduced in May 2009 and was not reflected in cigarette retail prices directly.

As a result, the increase had minimal immediate impact on consumers, but it might have more long term impact by changing cigarette product structure and consequent average price raising.<sup>11</sup> The 2009 adjustment raised the ad valorem tax from 45% to

1  
2  
3 56% at the producer price level for class A cigarettes and from 30% to 36% for class  
4  
5  
6 B cigarettes. The new policy also introduced a new 5% ad valorem tax at the  
7  
8 wholesale price level.<sup>12,13</sup> The intent of this 2009 adjustment was to raise government  
9  
10 revenue from CNTC, China's tobacco producer, not to serve as a tobacco control  
11  
12 policy instrument. Under the new scheme, the government forbade changes in the  
13  
14 retail prices of cigarettes.<sup>13-15</sup> The policy was introduced primarily to counteract the  
15  
16 impact of the global financial crisis on government revenue. Before this tax increase  
17  
18 in May 2009, China's public revenue had declined for the previous seven months.  
19  
20  
21 Between January and April 2009, public revenue decreased 9.9% while public  
22  
23 spending increased 31.7%. The financial pressure prompted the government to raise  
24  
25 the tobacco tax. In other words, this policy was driven by an economic goal, and  
26  
27 because the policy forbade the tobacco industry from adding the tax increase to the  
28  
29 retail price of cigarettes, the social goal was not considered at all.<sup>13,14</sup>  
30  
31  
32  
33  
34  
35 The second tobacco tax increase occurred in May 2015. Unlike the 2009 tax  
36  
37 adjustment, the 2015 adjustment moved the increase from the tax base at the  
38  
39 wholesale price level to the retail price level, a significant step away from the 2009  
40  
41 increase and toward China's tobacco control agenda.<sup>16</sup> The 2015 tax increase initiated  
42  
43 a 0.10 RMB tax per pack at the wholesale price level and increased the ad valorem  
44  
45 tax from 5% to 11%, a 6% increase also at the wholesale price level. However, this  
46  
47  
48 time, the Chinese government allowed the tobacco industry to shift this new tax  
49  
50  
51 increase to the retail price, an estimated 10% increase in the retail price of cigarettes.<sup>17</sup>  
52  
53  
54  
55  
56  
57  
58  
59  
60



1  
2  
3  
4  
5  
6  
7  
8  
9  
10  
11  
12  
13  
14  
15  
16  
17  
18  
19  
20  
21  
22  
23  
24  
25  
26  
27  
28  
29  
30  
31  
32  
33  
34  
35  
36  
37  
38  
39  
40  
41  
42  
43  
44  
45  
46  
47  
48  
49  
50  
51  
52  
53  
54  
55  
56  
57  
58  
59  
60

China's new administration came into power in 2013. Support from its top leader, President Xi, began to change the policy direction of tobacco control in China.<sup>18</sup> The national policy change began with the anti-corruption campaign, which was aimed at the problem of corruption within the party, state, and business sectors.<sup>19</sup> In November 2013, the government forbade the purchase of cigarettes using public revenue. A month later additional policies were announced that prohibited cadres from smoking in public places. This significant policy initiative can be considered a major government effort to change the social norm of smoking habits in China.

**Insert Figure 1 Here**

One factor that has influenced the trend of increased cigarette consumption in China is the rapid growth of personal income. China has experienced the largest economic transformation in human history. Following the 1978 economic reform, the Chinese economy grew around 9.5% each year, becoming the second largest economy in the world. In recent years, China's economic performance has remained at a relatively high level of 7% growth. While the income of people in China also has increased significantly, an increase in cigarette prices has not accompanied the GDP growth, thus making cigarettes more affordable over time.<sup>20,21</sup>

Waiting for China to take robust measures to control its tobacco use, change the social norm and policy landscape, reduce the institutional barriers created by the China

1  
2  
3 STMA, and counteract the increased consumption of cigarettes resulting from income  
4  
5  
6 growth is a long and frustrating process.

7  
8 The purpose of this paper is to estimate the relative impacts of four tobacco control  
9  
10 policy interventions on tobacco consumption in China: the international WHO policy  
11  
12 (FCTC), the government's 2013 national policy forbidding use of general revenue to  
13  
14 purchase cigarettes and smoking in public by cadres, and the tax increases of 2009  
15  
16 and 2015. This is the first study to estimate the combined impact of international and  
17  
18 domestic tobacco control policy changes on long-term trends in tobacco consumption  
19  
20  
21  
22  
23 in China.

## 24 25 **Methods**

### 26 27 *Data*

28  
29 We used the monthly data on cigarette sales from January 2000 to June 2017, a total  
30  
31 of 210 months of data reported by CNTC. Sales data, collected by CNTC, are based  
32  
33 on the purchases of retailers, so the exact monthly sales are determined by the dates  
34  
35 when retailers buy from cigarette distributors.  
36  
37

### 38 39 *Patient and Public Involvement*

40  
41 There is no patient and public involvement of the data collection.

42  
43  
44 Between 2000 and 2016, China's total population increased by 9.1%. To adjust for  
45  
46 the effect of population growth on cigarette sales, this study uses the average packs of  
47  
48 cigarettes consumed each month per capita.<sup>22</sup> To estimate policy impacts, we include  
49  
50 the GDP growth rate, the timing of policy interventions, and trends initiated by each  
51  
52 of the four policy interventions studied here.  
53  
54  
55  
56

1  
2  
3 During the study period, several tobacco control policies were implemented in China.  
4

5  
6 As discussed in the introduction section, the first was the ratification of WHO's  
7  
8 FCTC, the implementation of which began in January 2006. In May 2009, China  
9  
10 raised cigarette taxes, but the increase was not reflected in the retail price. In 2013,  
11  
12 tobacco control received top leadership support. In November, a national policy was  
13  
14 issued forbidding government funds from being used to purchase cigarettes for  
15  
16 officials, and a month later, in December, the Central Committee of the Communist  
17  
18 Party of China (CCCPC) and the State Council jointly issued a policy prohibiting  
19  
20 cadres from smoking in public places. This national policy targeted party officials and  
21  
22 government agencies. In May 2015, China again raised cigarette taxes, this time  
23  
24 allowing retail prices to rise.  
25  
26  
27  
28  
29

30 Since the implementation of WHO's FCTC, smoke-free policies have been  
31  
32 established in different cities or regions of China. The Beijing Municipal Government  
33  
34 passed the strictest smoke-free regulation in May 2015. But a national smoke-free law  
35  
36 has not passed. Therefore, the effect of smoke-free policies is an unmeasured effect in  
37  
38 the model.  
39  
40  
41

42 We divided the analysis into five time periods: (1) before the FCTC was implemented  
43  
44 (January 2000 to December 2005); (2) between implementation of the FCTC and the  
45  
46 first tax policy adjustment (January 2006 to April 2009); (3) between the first tax  
47  
48 policy adjustment and implementation of the national policy change (May 2009 to  
49  
50 October 2013); (4) between implementation of the national policy change and the  
51  
52  
53  
54  
55  
56  
57  
58  
59  
60

second tax policy adjustment (November 2013 to April 2015); and (5) the period after all policies were implemented (May 2015 to June 2017).

Table 1 presents descriptive statistics of the GDP growth rates and average packs of cigarettes consumed during each of the five periods studied.

**Table 1 Average cigarette consumption and GDP growth in different periods**

| Period               | Policies           | Number of Months | Average Consumption (Pack/month) | Average GDP Growth (%) |
|----------------------|--------------------|------------------|----------------------------------|------------------------|
| Jan 2000 to Dec 2005 | No Policies        | 72               | 5.66 (0.57)                      | 9.54 (1.06)            |
| Jan 2006 to Apr 2009 | FCTC Only          | 40               | 6.78 (1.22)                      | 11.86 (2.02)           |
| May 2009 to Oct 2013 | FCTC/Tax1          | 54               | 7.43 (1.83)                      | 8.87 (1.11)            |
| Nov 2013 to Apr 2015 | FCTC/Tax1/National | 18               | 7.69 (2.14)                      | 7.32 (0.25)            |
| May 2015 to Jun 2017 | All Policies       | 26               | 7.20 (1.56)                      | 6.81 (0.10)            |

The GDP growth rates during the 17 years for which we have data reached 14.16% in 2007 and then dropped to 6.7% in 2016. The average growth rate over the analysis period was 9.36%. The decline in GDP growth rates began in 2012.

#### *Statistical Analysis*

Segmented regression analysis of interrupted time series is an effective statistical method to evaluate longitudinal effects of time-delimited interventions,<sup>23</sup> and it is widely used in assessing policy impact. In this model, two parameters are estimated for each intervention studied: level and trend. The level parameter defines the y-intercept, which is the immediate effect of the intervention on the outcome. The time trend interaction with the intervention variable is the rate of change (the slope), which measures the gradual change of the outcomes due to the intervention.<sup>24,25</sup>

We estimated the segmented regression model using SAS AUTOREG procedures to assess the longitudinal impact of tobacco control policies on the average cigarette consumption per month per capita. We estimated levels and trends of the four interventions: FCTC (2005), first taxation (2009), national policies (2013), and second taxation (2015). The monthly pattern of sales was adjusted by the AR parameters in AUTOREG procedure.

## Results

Table 2 presents an estimation of the model describing average sales of packs of cigarettes consumed per person per month. Overall, the model is very significant with a total R-squared of 0.9416. The transformed R-squared is 0.995, indicating an extremely high fit of the model and the existence of autocorrelation.

**Table 2: Auto-regression model estimate of the per-capita monthly cigarette consumption**

| Maximum-Likelihood Estimates of the Model |          |              |         |
|-------------------------------------------|----------|--------------|---------|
| SSE                                       | 30.94    | DFE          | 187     |
| MSE                                       | 0.165    | Root MSE     | 0.407   |
| SBC                                       | 338.86   | AIC          | 261.88  |
| MAE                                       | 0.27     | AICC         | 267.81  |
| MAPE                                      | 4.04     | HQC          | 293.00  |
| Log Likelihood                            | -107.94  | Observations | 210     |
| Total R <sup>2</sup>                      |          |              | 0.9416  |
| Transformed R <sup>2</sup>                |          |              | 0.9950  |
| Parameter Estimates                       |          |              |         |
| Variable                                  | Estimate | t Value      | Pr >  t |

|               |         |       |        |
|---------------|---------|-------|--------|
| Intercept     | 4.8353  | 70.45 | <.0001 |
| GDP Growth    | 0.0180  | 2.10  | 0.0371 |
| Time          | 0.0184  | 32.99 | <.0001 |
| FCTC          | -0.1101 | -2.53 | 0.0121 |
| FCTC_time     | 0.0046  | 2.37  | 0.0189 |
| Tax1          | -0.0462 | -1.38 | 0.1686 |
| Tax1_time     | -0.0097 | -7.55 | <.0001 |
| National      | -0.3056 | -5.63 | <.0001 |
| National_time | 0.0078  | 1.72  | 0.0871 |
| Tax2          | -0.4309 | -6.39 | <.0001 |
| Tax2_time     | -0.0382 | -8.30 | <.0001 |
| AR1           | 0.6277  | 8.87  | <.0001 |
| AR2           | 0.5907  | 8.04  | <.0001 |
| AR3           | 0.5834  | 7.83  | <.0001 |
| AR4           | 0.5588  | 7.33  | <.0001 |
| AR5           | 0.5435  | 7.00  | <.0001 |
| AR6           | 0.5458  | 6.85  | <.0001 |
| AR7           | 0.5412  | 6.72  | <.0001 |
| AR8           | 0.5397  | 6.72  | <.0001 |
| AR9           | 0.5546  | 6.98  | <.0001 |
| AR10          | 0.5662  | 7.23  | <.0001 |
| AR11          | 0.5644  | 7.32  | <.0001 |
| AR12          | -0.3572 | -4.83 | <.0001 |

The time effect is positive and significant, indicating the urgency to interrupt the trend of increasing cigarette consumption in China to reduce the burden of diseases and death due to smoking.

1  
2  
3 The parameter estimate shows that GDP growth has a positive and statistically  
4 significant impact on monthly cigarette consumption. GDP growth indicates a macro  
5 income effect; this effect conforms with the literature that the income elasticity of  
6 cigarette consumption is positive.  
7  
8  
9  
10  
11

12  
13 In terms of the impact of tobacco control policies, implementation of the FCTC in  
14 2006 resulted in an immediate reduction in the number of cigarettes consumed.  
15  
16 However, after the initial reduction, consumption again rose over time, indicating that  
17 either the tobacco industry developed new strategies to counteract the FCTC policy or  
18 consumers resumed the intensity of their smoking habits after the initial reaction to  
19 the macro-policy change.  
20  
21  
22  
23  
24  
25  
26  
27

28 Similar to what happened after implementation of the international treaty, when the  
29 CCCPC and the State Council jointly issued a national policy on cadres and  
30 governments in 2013, consumption of cigarettes dropped immediately. The drop  
31 following announcement of the national policy was about three times the drop in  
32 consumption after implementation of the FCTC. Again, similar to what happened  
33 after implementation of the FCTC, the trend after the change in national policy was  
34 positive subsequent to the drop, but not statistically significant. This finding shows  
35 that while the 2013 national policy changes aimed at changing cigarette-related social  
36 norms could immediately impact average sales, the after effect was counteracted by  
37 either consumer habits or more aggressive marketing strategies by the tobacco  
38 industry.  
39  
40  
41  
42  
43  
44  
45  
46  
47  
48  
49  
50  
51  
52  
53  
54  
55  
56  
57  
58  
59  
60

1  
2  
3 As for China's two tobacco tax initiatives, the coefficient of the Tax 1 (2009) variable  
4  
5 is not statistically significant, as one would have expected. Over time, the tobacco  
6  
7 industry restructured its market share but the magnitude of the coefficient of the time  
8  
9 and tax interaction term is still very small, though statistically significant. However,  
10  
11 the coefficient of the Tax 2 (2015) variable and its time trend interaction term are both  
12  
13 statistically significant with a magnitude four times larger than the FCTC effect and  
14  
15 50 percent higher than the national policy effect. As shown from the coefficient and  
16  
17 its interaction term, the 2015 tobacco tax increase (Tax 2) essentially reduced per  
18  
19 capita monthly consumption by 0.43 pack initially and then continued to reduce  
20  
21 consumption by 0.04 pack per capita per month over time.  
22  
23  
24  
25  
26  
27

28 The implementation of both tax increases (2009 and 2015) resulted in similar initial  
29  
30 effects and time trends. The initial effect of the second (2015) tax increase, aimed at  
31  
32 wholesale and retail prices, was about ten times the initial effect of the 2009 tax  
33  
34 increase. The trend effect of the 2015 policy was about four times the trend effect of  
35  
36 the first tax increase. In addition, unmeasured smoke-free model effects might have  
37  
38 contributed to the big impact of the 2015 tax increase.  
39  
40  
41  
42

43 This finding indicates that unless specific policies are targeted at smokers, generalized  
44  
45 policies advocating tobacco control may result in some immediate effects, but they  
46  
47 won't be able to change smokers' behavior over time.  
48  
49

50 Tax increases are much more effective at changing smokers' behavior than  
51  
52 generalized policies. This was true of even the first tax increase (in 2009), which  
53  
54 was not reflected in the retail price of cigarettes. When the tax increase was factored  
55  
56  
57



1  
2  
3 into the retail price (in 2015), the impact on cigarette consumption was much larger  
4  
5  
6 and was sustained over time.

7  
8 Figure 2 presents China's average monthly packs of cigarettes consumed per capita  
9  
10 per year from 2000-2017 with and without accounting for tobacco control policies.

11  
12 Before the FCTC policy was implemented, between 2000 and 2005, average  
13  
14 consumption increased from 5.1 packs to 6.3 packs per capita per month, an increase  
15  
16 of 23.5% in six years.  
17

18  
19 Between 2006 and 2013, monthly cigarette consumption grew from 6.4 packs to 7.7  
20  
21 packs, an increase of 20.3% in seven years. Consumption then began to decrease in  
22  
23 2013. By the end of 2016, the average number of packs of cigarettes consumed  
24  
25 monthly had dropped from 7.7 to 7.2, a 6.5% decrease in three years. Without the tax  
26  
27 increase, average consumption was predicted at 8.6 packs, 16.3% higher than with the  
28  
29 tax increase.  
30  
31  
32  
33

34  
35 The 2013 policy announcements by the Chinese national government changed  
36  
37 smoking-related social norms. Combined with the global FCTC intervention and the  
38  
39 first tax increase (2009), the growing trend of cigarette consumption per month per  
40  
41 capita in China finally began to decline, and the second tax increase (2015) had a  
42  
43 much bigger impact on the downward trend.  
44  
45  
46  
47  
48  
49

50 **Insert Table 2 Here**

Based on the model estimates, we calculated the total impact of various policies on the average number of packs of cigarettes consumed per month. Table 3 presents the percentage change in average monthly consumption of cigarettes, with and without tobacco control policies. The percentage effect is calculated as follows:

$$\% \text{ Change} = (Y^{\wedge}_{\text{policies}=1} - Y^{\wedge}_{\text{policies}=0}) / Y^{\wedge}_{\text{policies}=0}$$

**Table 3: Impact of tobacco control policies on average monthly cigarette consumption per capita**

| Policy Period           | Predicted Monthly Consumption in Packs of Cigarettes with Policies<br>( $Y^{\wedge}_{\text{policies}=1}$ ) | Predicted Monthly Consumption in Packs of Cigarettes without Policies<br>( $Y^{\wedge}_{\text{policies}=0}$ ) | % Change<br>( $Y^{\wedge}_{\text{policies}=1} - Y^{\wedge}_{\text{policies}=0}$ ) / $Y^{\wedge}_{\text{policies}=0}$ | % Marginal Change |
|-------------------------|------------------------------------------------------------------------------------------------------------|---------------------------------------------------------------------------------------------------------------|----------------------------------------------------------------------------------------------------------------------|-------------------|
| No Policies             | 5.680                                                                                                      | 5.680                                                                                                         | 0.00%                                                                                                                | 0.00%             |
| FCTC Only               | 6.737                                                                                                      | 6.754                                                                                                         | -0.25%                                                                                                               | -0.25%            |
| FCTC/Tax1               | 7.450                                                                                                      | 7.566                                                                                                         | -1.54%                                                                                                               | -1.29%            |
| FCTC/Tax1/National      | 7.668                                                                                                      | 8.202                                                                                                         | -6.51%                                                                                                               | -4.97%            |
| FCTC/Tax1/National/Tax2 | 7.176                                                                                                      | 8.598                                                                                                         | -16.54%                                                                                                              | -10.03%           |

Table 3 shows that during the 40-month period when only the FCTC policy was in effect (January 2006 through April 2009), average cigarette consumption dropped 0.25%, due mainly to the initial impact of the FCTC.

During the 54-month period that includes implementation of the FCTC and the first tax increase (May 2009 through October 2013), average consumption dropped 1.54%, and the marginal effect of the 2009 tax increase was -1.29%, indicating a very limited effect when the tax increase was not factored into the retail price.

During the 18-month period following issuance of the national policies (November 2013 through April 2015), but prior to the second tax increase instituted in May 2015,

the average consumption of cigarettes dropped 6·51%, and the national policy changes alone reduced monthly consumption by 4·97%.

After the second tax increase announced in May 2015, a big decline occurred in cigarette consumption. In the 26-month period following this tax increase (May 2015 through June 2017), the average consumption of cigarettes dropped 16·54%, due mainly to the effect of the second tax increase, which alone brought down average monthly consumption by 10·03%.

Table 4 presents the predicted effects of the four policies studied on cigarette consumption measured in million packs.

**Table 4: Impact of tobacco control policies on cigarettes consumption in million**

| Period               | packs |              |          |              |              |
|----------------------|-------|--------------|----------|--------------|--------------|
|                      | FCTC  | 1st Taxation | National | 2nd Taxation | All Policies |
| Jan 2006 to Apr 2009 | 893   | 0            | 0        | 0            | 893          |
| May 2009 to Oct 2013 | 1,377 | 7,106        | 0        | 0            | 8,484        |
| Nov 2013 to Apr 2015 | 505   | 2,606        | 10,042   | 0            | 13,153       |
| May 2015 to Jun 2017 | 771   | 3,980        | 15,336   | 30,949       | 51,036       |
| Total                | 3,547 | 13,693       | 25,377   | 30,949       | 73,567       |

Between January 2006 and June 2017, China consumed 1·348 trillion packs of cigarettes. The reduction in total consumption attributable to the policy changes was 73·6 billion packs, which is 5·18% of the sales predicted without policy interventions. Implementation of the FCTC decreased consumption by 3·5 billion packs, the first tax increase (2009) reduced consumption by 13·7 billion, the national policy announcements decreased it by 25·4 billion packs, and the largest reduction came

1  
2  
3 from the second tax increase (2015), including unmeasured local smoke-free  
4 policies--almost 31 billion packs in just 26 months.  
5  
6

7  
8 From announcement of the 2013 national policy change through June 2017, China  
9  
10 reduced the sales of cigarettes by 64.2 billion packs, a 12.57% reduction in the  
11  
12 average consumption of cigarettes in China.  
13  
14

### 15 **Discussion**

16  
17 The World Health Organization's FCTC, an international treaty, aims to provide a  
18  
19 roadmap to address the global tobacco epidemic using effective measures and  
20  
21 strategies. China ratified the treaty in November 2005 and began implementation in  
22  
23 January 2006.  
24  
25

26  
27 This study finds that the impact of national policy changes has been almost 20 times  
28  
29 larger than the impact of the WHO's FCTC treaty itself, and that national tobacco  
30  
31 control policy changes in China have been a determining factor in reversing the  
32  
33 increasing trend of tobacco consumption. In other words, implementing an  
34  
35 international treaty requires national policy and social norm changes to achieve the  
36  
37 goal of reducing tobacco consumption. Ratification of the treaty alone without  
38  
39 domestic policy implementation will have a very minimal effect.  
40  
41  
42  
43

44  
45 The process of integrating global social norms with domestic policy change took  
46  
47 exactly 10 years in China (November 2003 to November 2013).<sup>26</sup> Our study finds that  
48  
49 after the immediate effects of the policy changes were noted, the powerful STMA  
50  
51 developed countermeasures to dilute the impact of the policy changes. This finding  
52  
53  
54  
55  
56  
57  
58  
59  
60

1  
2  
3 confirms the challenges faced by and the persistence required for the global and  
4  
5 national tobacco control communities.<sup>27,28</sup>  
6  
7

8 Between 2006 and 2013, although the government raised the tobacco tax in May 2009,  
9  
10 the economic goal of increasing government revenue overpowered the social goal of  
11  
12 reducing tobacco consumption. The tax increase did not result in higher cigarette  
13  
14 prices for the consumer, thus minimizing the impact of this policy on  
15  
16 consumption.<sup>14,29</sup>  
17  
18  
19

20 When the 2015 tax policy raised retail cigarette prices, both immediate and trend  
21  
22 effects were very significant, and the total marginal effect was 7·8 times that of the  
23  
24 2009 tax increase. This finding indicates that tobacco control policies should be more  
25  
26 robust and target consumers  
27  
28 more directly through higher prices and tougher smoke-free regulations. Because  
29  
30 China has no national smoke-free law, and the impact of various local smoke-free  
31  
32 regulations on national cigarette consumption is difficult to measure, the impact of  
33  
34 taxation policy includes unmeasured effects of local smoke-free policies.  
35  
36  
37  
38

39 This study finds a significant positive income effect on consumption, which indicates  
40  
41 that cigarettes have become more affordable. A recent study shows that between 2001  
42  
43 and 2016, the affordability of cigarettes in China increased 1·85 times. It is important  
44  
45 to continue to raise the tobacco tax to offset the affordability influence on cigarette  
46  
47 consumption.<sup>21</sup>  
48  
49  
50

51 This study shows empirically that raising the tobacco tax through increasing retail  
52  
53 prices is the most effective tobacco control policy instrument in China. Currently  
54  
55  
56  
57

1  
2  
3 China has a relatively low cigarette tax rate, 56% of the retail price.<sup>16</sup> The WHO  
4  
5 guideline for an effective tobacco control benchmark is a tax rate of 75% of the retail  
6  
7 price.<sup>30</sup> Comparing China's tax rate with the WHO guideline reveals that China has a  
8  
9 lot of room to raise its tax on tobacco. Raising the tobacco tax will save lives, reduce  
10  
11 smoking-related medical costs, and generate additional government revenue.  
12  
13  
14  
15

### 16 17 18 **Contributorship statement**

19  
20 Xiaoxin Xu: Conducted literature review, participated in data collection and  
21  
22 manuscript writing; Xiulan Zhang: Directed and verified data collection, estimated the  
23  
24 models and drafted the findings of the models and the discussions; Teh-wei Hu:  
25  
26 Reviewed the models and findings, participated in writing and discussions; Leonard  
27  
28 S. Miller: Reviewed the models ad findings, participated in drafting the main findings  
29  
30 of the models; and Mengnan Xu: Participated in data collection and verification,  
31  
32 participated in literature review.  
33  
34  
35  
36  
37

### 38 39 **Competing Interest**

40  
41 The authors declare that they have no competing interests.  
42  
43

### 44 45 **Funding**

46  
47 Bill & Melinda Gates Foundation  
48

#### 49 50 *Role of the funding source*

51  
52 The funder had no role in the study design, collection, analysis, or interpretation of  
53  
54 the data, writing the manuscript, or the decision to submit the paper for publication.  
55  
56  
57

1  
2  
3 The corresponding author had full access to all data in the study and had final  
4  
5  
6 responsibility for the decision to submit for publication.  
7

### 8 **Data sharing statement**

9  
10 Extra data is available by emailing Xiulan Zhang.  
11  
12  
13  
14  
15

### 16 **Reference**

- 17 1. The bill China cannot afford: Health, economic and social costs of China's  
18 tobacco epidemic. Manila: World Health Organization Regional Office for the  
19 Western Pacific, 2017.
- 20 2. Chen Z, Peto R, Zhou M, et al. Contrasting male and female trends in  
21 tobacco-attributed mortality in China: evidence from successive nationwide  
22 prospective cohort studies. *The Lancet* 2015; **386**(10002): 1447-56.
- 23 3. Development of China's tobacco industry in 2000 (in Chinese). *China Tobacco*  
24 2001; (4).
- 25 4. Analysis of China's tobacco market in 2016 (in Chinese). *China Tobacco* 2017;  
26 (5): 62-5.
- 27 5. Yang G, Wang Y, Wu Y, Yang J, Wan X. The road to effective tobacco control  
28 in China. *The Lancet* 2015; **385**(9972): 1019-28.
- 29 6. Chen MH. Economic concerns hamper tobacco control in China. *The Lancet*  
30 2007; **370**(9589): 729-30.
- 31 7. Clarke H, Tan BJ. Tobacco use control policies in China. *Economic Papers: A*  
32 *journal of applied economics and policy* 2011; **30**(4): 490-6.
- 33 8. Pratt CB. China's tobacco industry's communication practices: Paradoxes and  
34 proposals for public policymaking. *Public Relations Review* 2011; **37**(3): 318-20.
- 35 9. Huang Y. China's position in negotiating the Framework Convention on Tobacco  
36 Control and the revised International Health Regulations. *Public Health* 2014; **128**(2):  
37 161-6.
- 38 10. Jin J. Why FCTC policies have not been implemented in China: Domestic  
39 dynamics and tobacco governance. *Journal of Health Politics, Policy and Law* 2014;  
40 **39**(3): 633-66.
- 41 11. Zheng R, Gao S, Hu T-W. Tobacco tax and tobacco control: Global experience  
42 and its application in China (in Chinese). *Finance & Trade Economics* 2013; **34**(3):  
43 44-53.
- 44 12. Ministry of Finance, State Administration of Taxation. Notice on adjustment to  
45 excise tax on tobacco products(Taxation Document No.2009-84)(in Chinese). 2009.
- 46 13. Hu T-W, Mao Z, Shi J. Recent tobacco tax rate adjustment and its potential  
47 impact on tobacco control in China. *Tobacco Control* 2010; **19**(1): 80-2.

14. Shi J, Hu T-W, Mao Z. Economic effect analysis of China's tobacco excise tax reform(in Chinese). *Review on Finance and Economics* 2011; (1): 52-9.
15. Gao S, Zheng R, Hu T-W. Can increases in the cigarette tax rate be linked to cigarette retail prices? Solving mysteries related to the cigarette pricing mechanism in China. *Tobacco Control* 2012; **21**(6): 560-2.
16. Hu T-W, Zhang X, Zheng R. China has raised the tax on cigarettes: what's next? *Tobacco Control* 2015; **25**(6): 609-11.
17. Zheng R, Wang Y, Hu X. Tobacco tax: theory, system design, and policy practice (in Chinese). *Financial Minds* 2016; **1**(6): 5-30.
18. Mackay J. China: the tipping point in tobacco control. *British Medical Bulletin* 2016; **120**(1): 15-25.
19. Wedeman A. Xi Jinping's Hunt: Anti-corruption campaign or factional purge? *Modern China Studies* 2017; **24**(2): 35-94.
20. Wang L, Yan Y, Yi N, Mengwu T, Jijiang W, Yuan J. Cigarette consumer price and affordability in China: results from 2015 China adult survey. *Chinese Journal of Epidemiology* 2017; **38**(1): 69-72.
21. Zheng R, Wang Y, Hu X, Marquez PV. Cigarette affordability in China: 2001-2016. Washington, DC.: World Bank, 2017.
22. Hu T-W, Sung HY, Keeler TE. Reducing cigarette consumption in California: tobacco taxes vs an anti-smoking media campaign. *American Journal of Public Health* 1995; **85**(9): 1218-22.
23. McDowall D, McCleary R, Meidinger EE, Hay RA. Interrupted time series analysis. Thousand Oaks, CA: Sage Publications, Inc; 1980.
24. Wagner AK, Soumerai SB, Zhang F, Ross-Degnan D. Segmented regression analysis of interrupted time series studies in medication use research. *Journal of Clinical Pharmacy & Therapeutics* 2002; **27**(4): 299-309.
25. Nistal-Nuño B. Segmented regression analysis of interrupted time series data to assess outcomes of a South American road traffic alcohol policy change. *Public Health* 2017; **150**(Supplement C): 51-9.
26. Eight years' implementation of World Health Organization Framework Convention on Tobacco Control(in Chinese). 2013.  
[http://www.chinacdc.cn/jkzt/jkcj/sthd\\_3844/slhd\\_4153/201305/t20130515\\_80977.htm](http://www.chinacdc.cn/jkzt/jkcj/sthd_3844/slhd_4153/201305/t20130515_80977.htm) (accessed 12-31 2017).
27. Hu T-W, Lee AH, Mao Z. WHO Framework Convention on Tobacco Control in China: Barriers, challenges and recommendations. *Global Health Promotion* 2013; **20**(4): 13-22.
28. Xiao D, Bai C-X, Chen Z-M, Wang C. Implementation of the World Health Organization Framework Convention on Tobacco Control in China: An arduous and long-term task. *Cancer* 2015; **121**(S17): 3061-8.
29. Gao S, Zheng R. Price, tax and cigarette smoking: Simulations of China's tobacco tax policy. *Frontiers of Economics in China* 2012; **7**(4): 604-26.
30. World Health Organization. WHO technical manual on tobacco tax administration. Geneva, Switzerland: World Health Organization, 2010.



1  
2  
3  
4  
5  
6  
7  
8  
9  
10  
11  
12  
13  
14  
15  
16  
17  
18  
19  
20  
21  
22  
23  
24  
25  
26  
27  
28  
29  
30  
31  
32  
33  
34  
35  
36  
37  
38  
39  
40  
41  
42  
43  
44  
45  
46  
47  
48  
49  
50  
51  
52  
53  
54  
55  
56  
57  
58  
59  
60

For peer review only

**Figure 1: Timeline of tobacco control policies in China**

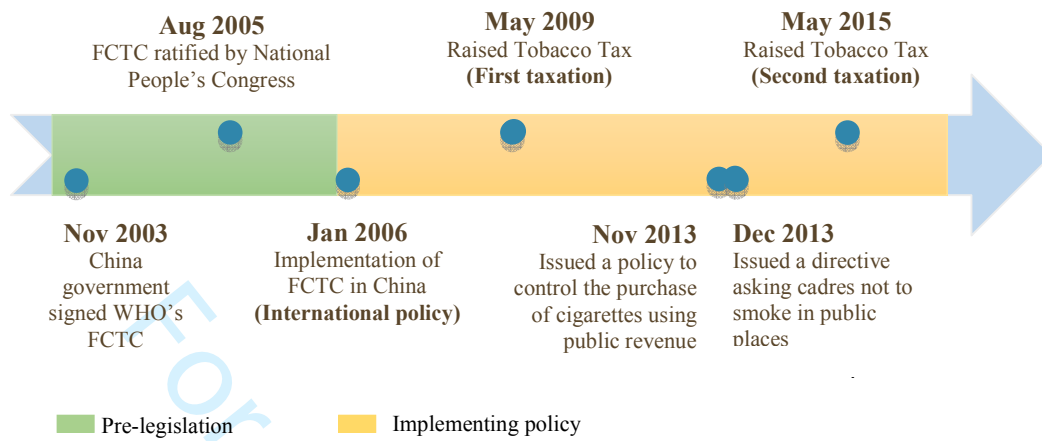

**Figure 2: Estimated monthly average packs of cigarettes consumed in China per capita with and without accounting for tobacco control policies, 2000-2017**

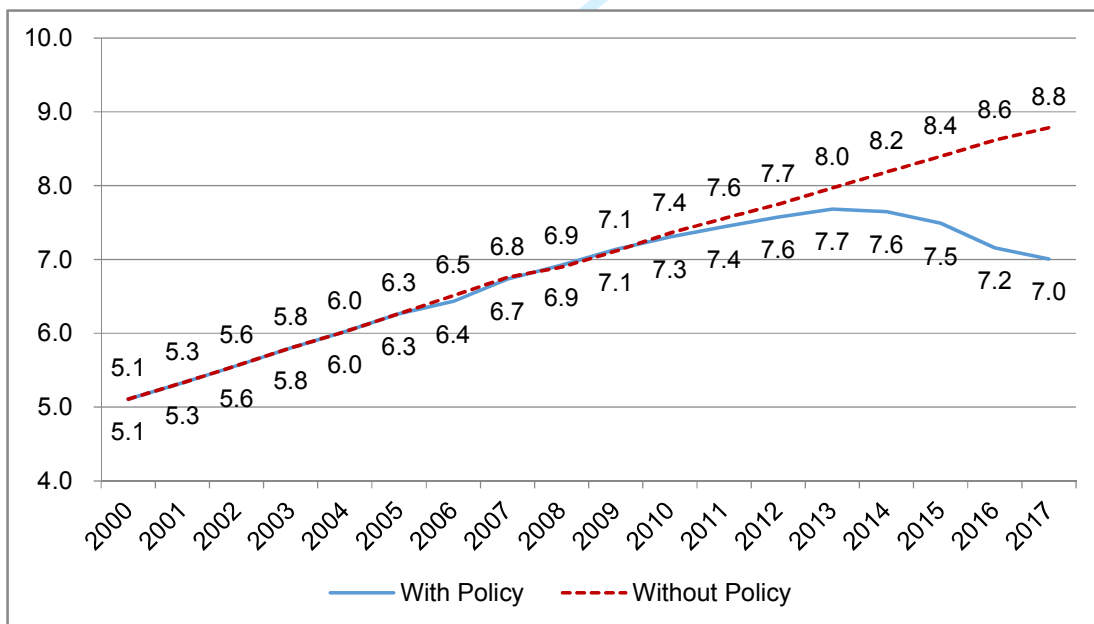

# BMJ Open

## Effects of global and domestic tobacco control policies on cigarette consumption per capita: An evaluation using monthly data in China

|                                 |                                                                                                                                                                                                                                                                                                                                                                                                                                       |
|---------------------------------|---------------------------------------------------------------------------------------------------------------------------------------------------------------------------------------------------------------------------------------------------------------------------------------------------------------------------------------------------------------------------------------------------------------------------------------|
| Journal:                        | <i>BMJ Open</i>                                                                                                                                                                                                                                                                                                                                                                                                                       |
| Manuscript ID                   | bmjopen-2018-025092.R1                                                                                                                                                                                                                                                                                                                                                                                                                |
| Article Type:                   | Research                                                                                                                                                                                                                                                                                                                                                                                                                              |
| Date Submitted by the Author:   | 12-Feb-2019                                                                                                                                                                                                                                                                                                                                                                                                                           |
| Complete List of Authors:       | Xu, Xiaoxin; Beijing Normal University, School of Social Development and Public Policy<br>Zhang, Xiulan; Beijing Normal University, School of Social Development and Public Policy<br>Hu, Teh-wei; Public Health Institute, Center for International Tobacco Control<br>Miller, Leonard; University of California, School of Social Welfare<br>XU, Mengnan; Beijing Normal University, School of Social Development and Public Policy |
| <b>Primary Subject Heading</b>: | Smoking and tobacco                                                                                                                                                                                                                                                                                                                                                                                                                   |
| Secondary Subject Heading:      | Global health, Health economics, Health policy                                                                                                                                                                                                                                                                                                                                                                                        |
| Keywords:                       | global health, smoking, global and domestic health policies, China, tobacco control                                                                                                                                                                                                                                                                                                                                                   |
|                                 |                                                                                                                                                                                                                                                                                                                                                                                                                                       |

SCHOLARONE™  
Manuscripts

1  
2  
3  
4 **Effects of global and domestic tobacco control policies on cigarette**  
5  
6  
7 **consumption per capita: An evaluation using monthly data in China**  
8  
9

10 **Word Count: 3860**  
11

12  
13 Xu Xiaoxin, Xiulan Zhang, Teh-wei Hu, Leonard Miller, Mengnan Xu  
14

15  
16 **Authors**  
17

18 Xiaoxin Xu, Ph.D.,  
19

20 School of Social Development and Public Policy,  
21

22 Beijing Normal University, China  
23

24 Email: xuxiaoxin@bnu.edu.cn  
25  
26  
27  
28

29 Xiulan Zhang, Ph.D.,  
30

31 School of Social Development and Public Policy,  
32

33 Beijing Normal University, China  
34

35 Email: zhang99@bnu.edu.cn  
36  
37  
38  
39

40 Teh-wei Hu, Ph.D.,  
41

42 Center for International Tobacco Control,  
43

44 Public Health Institute, Oakland, CA, USA  
45

46 Email: thu@berkeley.edu  
47  
48  
49

50 Leonard S. Miller, Ph.D.,  
51

52 School of Social Welfare,  
53  
54  
55  
56  
57  
58  
59  
60

1  
2  
3 University of California, Berkeley, CA, USA  
4

5 Email: lsmiller2331@gmail.com  
6  
7  
8  
9

10 Mengnan Xu, B.S.,

11 School of Social Development and Public Policy,  
12

13 Beijing Normal University, China  
14

15 Email: pumpkinggg@126.com  
16  
17  
18  
19  
20

21 **Correspondence:** Xiulan Zhang,  
22

23 School of Social Development and Public Policy, Beijing Normal University, Beijing,  
24

25 China, 19 Xijiekouwai Street, Haidian District, Beijing, 100875, China. Tel: (86-10)  
26

27 5880-1512; Fax: (86-10) 5880-0366; Email: zhang99@bnu.edu.cn  
28  
29  
30  
31  
32  
33  
34  
35  
36  
37  
38  
39  
40  
41  
42  
43  
44  
45  
46  
47  
48  
49  
50  
51  
52  
53  
54  
55  
56  
57  
58  
59  
60

## Abstract

**Introduction** China consumes 44% of the world's cigarettes. Robust tobacco control measures are needed to stop the continuing trend of increased cigarette consumption. This paper looks into the effective policies that might have the desired impact on reducing tobacco use in China.

**Methods** Monthly data on cigarette consumption per capita from January 2000 to June 2017, calculated from China National Tobacco Corporation's monthly sales data and China National Bureau of Statistics' demographic data, are used to estimate the impact of specific policies on China's tobacco consumption. The policies studied include the World Health Organization's (WHO) Framework Convention on Tobacco Control (FCTC), national tobacco-related policy changes, and two tobacco tax increases implemented in China during the study period. Segmented regression analysis is used to estimate the immediate effect of the policies studied and changes in the time trends resulting from these policy changes.

**Findings** The impact of national policy changes in China is almost 20 times greater than the impact of the WHO's FCTC treaty itself, and national policy changes in tobacco control are a determining factor in reversing the trend of increased tobacco consumption in China. The 2015 tax increase, which raised retail cigarette prices, produced both immediate and trend effects, with a total marginal effect 7.8 times that of the 2009 tax increase, which did not result in higher cigarette prices for the consumer.

**Interpretations** Translating global social norms of tobacco control into national policies will generate much higher impact on average cigarette consumption, and tobacco taxes

1  
2  
3 that are reflected in the retail prices will be more effective in reducing the consumption of  
4  
5 cigarettes.  
6  
7  
8  
9

### 10 **Strengths and limitations of this study**

- 11  
12 1. To the best of our knowledge, this study is the first systematic evaluation of the  
13  
14 impact of both domestic and global tobacco control policies on tobacco consumption  
15  
16 in China.  
17  
18
- 19 2. The study compares the effectiveness of the global FCTC and domestic policies to  
20  
21 reduce cigarette consumption in China over a period of 17.5 years.  
22  
23
- 24 3. The data used for the policy evaluation covers the periods from no tobacco control  
25  
26 policies in China to the implementation of FCTC policies to the changed national  
27  
28 policies to the specific tax increases enacted in China in 2009 and 2015.  
29  
30
- 31 4. Using the interrupted time series model, the study not only examines the immediate  
32  
33 impact of each policy on tobacco consumption, but also the policy impact on tobacco  
34  
35 consumption trends.  
36  
37
- 38 5. The limitations of this study are that the social norm change has not been  
39  
40 incorporated into the models, and the cigarette consumption is based on wholesales  
41  
42 rather than retails.  
43  
44  
45  
46  
47  
48  
49  
50  
51  
52  
53  
54  
55  
56  
57  
58  
59  
60

## Introduction

The 315 million smokers in China consume 44% of the world's cigarettes, and their average consumption is 2.3 times the world average.<sup>1</sup> Tobacco use increases medical expenses by billions.<sup>1</sup> Each year, one million people in China, many of them young, die of tobacco-related diseases.<sup>2</sup> China's rapid economic development in the past 40 years has been accompanied by significant growth in the country's total cigarette consumption. In 2000, the China National Tobacco Corporation (CNTC), the state-owned tobacco monopoly, sold 76.92 billion packs of cigarettes;<sup>3</sup> by 2014, the number had grown to 127.48 billion packs,<sup>4</sup> an increase of 65.8 %.

China signed the World Health Organization's (WHO) Framework Convention on Tobacco Control (FCTC) in 2003; the China National People's Congress (CNPC) ratified the treaty in 2005, and China began implementing the FCTC in 2006, indicating China government should fulfill its legal obligation in accordance with the treaty.<sup>5</sup> The ratifying and implementation of the FCTC provided a moral and legal high ground for advocates on tobacco control<sup>6</sup>, though there was still a long way for the implementation of specific articles.<sup>7</sup> In this paper, we refer to the WHO framework as an international policy. While the Chinese government has made some effort to control tobacco use, strong interference from the China State Tobacco Monopoly Administration (STMA), which owns CNTC, in favoring economic concerns over social concerns, has led to slow development and implementation of the full tobacco control policy measures.<sup>8-13</sup>

Between 2006 and 2015, China increased tobacco taxes twice. The first tax increase was introduced in May 2009 and was not reflected in cigarette retail prices directly. As a result, the increase had minimal immediate impact on consumers, but it might have more



1  
2  
3 long term impact by changing cigarette product structure and consequent average price  
4 raising.<sup>14</sup> The 2009 adjustment raised the ad valorem tax from 45% to 56% at the  
5  
6 producer price level for class A cigarettes and from 30% to 36% for class B cigarettes.  
7  
8 The new policy also introduced a new 5% ad valorem tax at the wholesale price level.<sup>15 16</sup>  
9  
10 The intent of this 2009 adjustment was to raise government revenue from CNTC, China's  
11  
12 tobacco producer, not to serve as a tobacco control policy instrument. Under the new  
13  
14 scheme, the government forbade changes in the retail prices of cigarettes.<sup>16-18</sup> The policy  
15  
16 was introduced primarily to counteract the impact of the global financial crisis on  
17  
18 government revenue. Before this tax increase in May 2009, China's public revenue had  
19  
20 declined for the previous seven months. Between January and April 2009, public revenue  
21  
22 decreased 9.9% while public spending increased 31.7%. The financial pressure prompted  
23  
24 the government to raise the tobacco tax. In other words, this policy was driven by an  
25  
26 economic goal, and because the policy forbade the tobacco industry from adding the tax  
27  
28 increase to the retail price of cigarettes, the social goal was not considered at all.<sup>16 17</sup>  
29  
30 This is possible because cigarette pricing mechanism is unique in China under its tobacco  
31  
32 monopoly system. Both the cigarette allocation price, the price at which the tobacco  
33  
34 producers offer cigarettes to the wholesalers, and wholesale price, the price at which the  
35  
36 wholesalers offer cigarettes to retailers, are controlled by China State Tobacco Monopoly  
37  
38 Administration (STMA). In 2009 tobacco tax adjustment, STMA reduced the wholesale  
39  
40 profit margin but maintained the retail price unchanged. In this sense, the 2009 tobacco  
41  
42 tax adjustment could be regarded as a profit tax adjustment rather than an excise tax  
43  
44 adjustment. The second tobacco tax increase occurred in May 2015. Unlike the 2009 tax  
45  
46 adjustment, the 2015 adjustment moved the increase from the tax base at the wholesale  
47  
48  
49  
50  
51  
52  
53  
54  
55  
56  
57  
58  
59  
60

1  
2  
3 price level to the retail price level, a significant step away from the 2009 increase and  
4 toward China's tobacco control agenda.<sup>19</sup> The 2015 tax increase initiated a 0.10 RMB tax  
5 per pack at the wholesale price level and increased the ad valorem tax from 5% to 11%, a  
6  
7  
8  
9  
10 6% point increase also at the wholesale price level. However, this time, the Chinese  
11  
12 government allowed the tobacco industry to shift this new tax increase to the retail price,  
13  
14 an estimated 10% increase in the retail price of cigarettes.<sup>20</sup>

15  
16  
17 China's new administration came into power in 2013. Support from its top leader,  
18  
19 President Xi, began to change the policy direction of tobacco control in China.<sup>21</sup> The  
20  
21 national policy change began with the anti-corruption campaign, which was aimed at the  
22  
23 problem of corruption within the party, state, and business sectors.<sup>22</sup> In November 2013,  
24  
25 the government forbade the purchase of cigarettes using public revenue. A month later  
26  
27 additional policies were announced that prohibited state employees/officers from  
28  
29 smoking in public places. This significant policy initiative can be considered a major  
30  
31 government effort to change the social norm of smoking habits in China. Figure 1 shows  
32  
33 the timeline of major tobacco control policies in China.  
34  
35  
36  
37  
38  
39

40 **Insert Figure 1 Here**

41  
42  
43  
44 One factor that has influenced the trend of increased cigarette consumption in China is  
45  
46 the rapid growth of personal income. China has experienced the largest economic  
47  
48 transformation in human history. Based on data from China National Bureau of Statistics  
49  
50 (<http://data.stats.gov.cn/ks.htm?cn=C01&zb=A0501>), following the 1978 economic  
51  
52 reform, the Chinese economy grew around 9.5% each year, becoming the second largest  
53  
54  
55  
56  
57  
58  
59  
60

1  
2  
3 economy in the world according to World Bank's report.<sup>23</sup> In recent years, China's  
4 economic performance has remained at a relatively high level of 7% growth. While the  
5 income of people in China also has increased significantly, an increase in cigarette prices  
6 has not accompanied the GDP growth, thus making cigarettes more affordable over  
7 time.<sup>24 25</sup>

8  
9  
10  
11  
12  
13  
14  
15 Waiting for China to take robust measures to control its tobacco use, change the social  
16 norm and policy landscape, reduce the institutional barriers created by the China STMA,  
17 and counteract the increased consumption of cigarettes resulting from income growth is a  
18 long and frustrating process.

19  
20  
21  
22  
23  
24 The purpose of this paper is to estimate the relative impacts of four tobacco control policy  
25 interventions on tobacco consumption in China: first ever international public health  
26 treaty WHO's FCTC, the government's 2013 national policy forbidding use of general  
27 revenue to purchase cigarettes and smoking in public by state employees/officers, and the  
28 tax increases of 2009 and 2015. This is the first study to estimate the combined impact of  
29 international and domestic tobacco control policy changes on long-term trends in tobacco  
30 consumption in China.

## 31 32 33 34 35 36 37 38 39 40 **Methods**

### 41 42 **Data**

43  
44 We used the monthly data on cigarette sales from January 2000 to June 2017, a total of  
45 210 months of data reported by CNTC. Sales data, collected by CNTC, are based on the  
46 purchases of retailers, so the exact monthly sales are determined by the dates when  
47 retailers buy from cigarette distributors. We extracted these data from *China Tobacco*  
48  
49  
50  
51  
52  
53  
54  
55  
56  
57  
58  
59  
60 *Magazine* and its website ([www.echinatobacco.com](http://www.echinatobacco.com)), hosted by CNTC.

1  
2  
3 The population data were based on China Statistical Yearbook, extracted from the  
4 website of China National Bureau of Statistics (<http://www.stats.gov.cn/tjsj/ndsj/#>).  
5  
6 Between 2000 and 2016, China's total population increased by 9.1%. To adjust for the  
7 effect of population growth on cigarette sales, this study uses the average packs of  
8 cigarettes consumed each month per capita.<sup>26</sup> To estimate policy impacts, we include the  
9  
10 GDP growth rate, the timing of policy interventions, and trends initiated by each of the  
11 four policy interventions studied here.  
12  
13  
14  
15  
16  
17  
18

19 During the study period, several tobacco control policies were implemented in China. As  
20 discussed in the introduction section, the first was the ratification of WHO's FCTC, the  
21 implementation of which began in January 2006. In May 2009, China raised cigarette  
22 taxes, but the increase was not reflected in the retail price. In 2013, tobacco control  
23 received top leadership support. In November, a national policy was issued forbidding  
24 government funds from being used to purchase cigarettes for officials, and a month later,  
25 in December, the Central Committee of the Communist Party of China (CCCPC) and the  
26 State Council jointly issued a policy prohibiting cadres from smoking in public places.  
27  
28 This national policy targeted party officials and government agencies. In May 2015,  
29 China again raised cigarette taxes, this time allowing retail prices to rise.  
30  
31  
32  
33  
34  
35  
36  
37  
38  
39  
40  
41  
42  
43  
44  
45  
46  
47  
48  
49  
50  
51  
52  
53  
54  
55  
56  
57  
58  
59  
60

Since the implementation of WHO's FCTC, smoke-free policies have been established in  
different cities or regions of China. The Beijing Municipal Government passed the  
strictest smoke-free regulation in May 2015. But a national smoke-free law has not  
passed. Therefore, the effect of smoke-free policies is an unmeasured effect in the model.  
We divided the analysis into five time periods: (1) before the FCTC was implemented  
(January 2000 to December 2005); (2) between implementation of the FCTC and the first

tax policy adjustment (January 2006 to April 2009); (3) between the first tax policy adjustment and implementation of the national policy change (May 2009 to October 2013); (4) between implementation of the national policy change and the second tax policy adjustment (November 2013 to April 2015); and (5) the period after all policies were implemented (May 2015 to June 2017).

Table 1 presents descriptive statistics of the GDP growth rates and average packs of cigarettes consumed during each of the five periods studied.

**Table 1 Average cigarette consumption and GDP growth in different periods**

| Period               | Policies           | Number of Months | Average Consumption (Pack/month/per capita) | Average GDP Growth (%) |
|----------------------|--------------------|------------------|---------------------------------------------|------------------------|
| Jan 2000 to Dec 2005 | No Policies        | 72               | 5.66 (0.57)                                 | 9.54 (1.06)            |
| Jan 2006 to Apr 2009 | FCTC Only          | 40               | 6.78 (1.22)                                 | 11.86 (2.02)           |
| May 2009 to Oct 2013 | FCTC/Tax1          | 54               | 7.43 (1.83)                                 | 8.87 (1.11)            |
| Nov 2013 to Apr 2015 | FCTC/Tax1/National | 18               | 7.69 (2.14)                                 | 7.32 (0.25)            |
| May 2015 to Jun 2017 | All Policies       | 26               | 7.20 (1.56)                                 | 6.81 (0.10)            |

The GDP growth rates during the 17 years for which we have data reached 14.16% in 2007 and then dropped to 6.7% in 2016. The average growth rate over the analysis period was 9.36%. The decline in GDP growth rates began in 2012.

### ***Patient and Public Involvement***

There is no patient and public involvement of the data collection.

### ***Statistical Analysis***

Segmented regression analysis of interrupted time series is an effective statistical method to evaluate longitudinal effects of time-delimited interventions,<sup>27</sup> and it is widely used in assessing policy impact especially where randomization is not feasible.<sup>28</sup> In this model, two parameters are estimated for each intervention studied: level and trend. The level

parameter defines the y-intercept, which is the immediate effect of the intervention on the outcome. The time trend interaction with the intervention variable is the rate of change (the slope), which measures the gradual change of the outcomes due to the intervention.<sup>29</sup>

30

We estimated the segmented regression model using SAS AUTOREG procedures to assess the longitudinal impact of tobacco control policies on the average cigarette consumption per month per capita. We estimated levels and trends of the four interventions: FCTC (2005), first taxation (2009), national policies (2013), and second taxation (2015). The monthly pattern of sales was adjusted by the AR parameters in AUTOREG procedure.

## Results

Table 2 presents an estimation of the model describing average sales of packs of cigarettes consumed per person per month. Overall, the model is very significant with a total R-squared of 0.9416. The transformed R-squared is 0.995, indicating an extremely high fit of the model and the existence of autocorrelation.

**Table 2 Auto-regression model estimate of the per-capita monthly cigarette consumption**

| Maximum-Likelihood Estimates of the Model |          |              |         |
|-------------------------------------------|----------|--------------|---------|
| SSE                                       | 30.94    | DFE          | 187     |
| MSE                                       | 0.165    | Root MSE     | 0.407   |
| SBC                                       | 338.86   | AIC          | 261.88  |
| MAE                                       | 0.27     | AICC         | 267.81  |
| MAPE                                      | 4.04     | HQC          | 293.00  |
| Log Likelihood                            | -107.94  | Observations | 210     |
| Total R <sup>2</sup>                      |          |              | 0.9416  |
| Transformed R <sup>2</sup>                |          |              | 0.9950  |
| Parameter Estimates                       |          |              |         |
| Variable                                  | Estimate | t Value      | Pr >  t |
| Intercept                                 | 4.8353   | 70.45        | <.0001  |
| GDP Growth                                | 0.0180   | 2.10         | 0.0371  |
| Time                                      | 0.0184   | 32.99        | <.0001  |

|    |               |         |       |        |
|----|---------------|---------|-------|--------|
| 1  |               |         |       |        |
| 2  |               |         |       |        |
| 3  | FCTC          | -0.1101 | -2.53 | 0.0121 |
| 4  | FCTC_time     | 0.0046  | 2.37  | 0.0189 |
| 5  | Tax1          | -0.0462 | -1.38 | 0.1686 |
| 6  | Tax1_time     | -0.0097 | -7.55 | <.0001 |
| 7  | National      | -0.3056 | -5.63 | <.0001 |
| 8  | National_time | 0.0078  | 1.72  | 0.0871 |
| 9  | Tax2          | -0.4309 | -6.39 | <.0001 |
| 10 | Tax2_time     | -0.0382 | -8.30 | <.0001 |
| 11 | AR1           | 0.6277  | 8.87  | <.0001 |
| 12 | AR2           | 0.5907  | 8.04  | <.0001 |
| 13 | AR3           | 0.5834  | 7.83  | <.0001 |
| 14 | AR4           | 0.5588  | 7.33  | <.0001 |
| 15 | AR5           | 0.5435  | 7.00  | <.0001 |
| 16 | AR6           | 0.5458  | 6.85  | <.0001 |
| 17 | AR7           | 0.5412  | 6.72  | <.0001 |
| 18 | AR8           | 0.5397  | 6.72  | <.0001 |
| 19 | AR9           | 0.5546  | 6.98  | <.0001 |
| 20 | AR10          | 0.5662  | 7.23  | <.0001 |
| 21 | AR11          | 0.5644  | 7.32  | <.0001 |
| 22 | AR12          | -0.3572 | -4.83 | <.0001 |
| 23 |               |         |       |        |

24  
25  
26 The time effect is positive and significant, indicating the urgency to interrupt the trend of  
27 increasing cigarette consumption in China to reduce the burden of diseases and death due  
28 to smoking.  
29

30  
31  
32 The parameter estimate shows that GDP growth has a positive and statistically significant  
33 impact on monthly cigarette consumption. GDP growth indicates a macro income effect;  
34 this effect conforms with the literature that the income elasticity of cigarette consumption  
35 is positive.  
36  
37

38  
39  
40 In terms of the impact of tobacco control policies, implementation of the FCTC in 2006  
41 resulted in an immediate reduction in the number of cigarettes consumed. However, after  
42 the initial reduction, consumption again rose over time, indicating that either the tobacco  
43 industry developed new strategies to counteract the FCTC policy or consumers resumed  
44 the intensity of their smoking habits after the initial reaction to the macro-policy change.  
45  
46  
47  
48  
49  
50

51  
52  
53 Similar to what happened after implementation of the international treaty, when the  
54 CCCPC and the State Council jointly issued a national policy on cadres and governments  
55  
56  
57

1  
2  
3 in 2013, consumption of cigarettes dropped immediately. The drop following  
4  
5 announcement of the national policy was about three times the drop in consumption after  
6  
7 implementation of the FCTC. Again, similar to what happened after implementation of  
8  
9 the FCTC, the trend after the change in national policy was positive subsequent to the  
10  
11 drop, but not statistically significant. This finding shows that while the 2013 national  
12  
13 policy changes aimed at changing cigarette-related social norms could immediately  
14  
15 impact average sales, the after effect was counteracted by either consumer habits or more  
16  
17 aggressive marketing strategies by the tobacco industry.  
18  
19

20  
21 As for China's two tobacco tax initiatives, the coefficient of the Tax 1 (2009) variable is  
22  
23 not statistically significant, as one would have expected. Over time, the tobacco industry  
24  
25 restructured its market share but the magnitude of the coefficient of the time and tax  
26  
27 interaction term is still very small, though statistically significant. However, the  
28  
29 coefficient of the Tax 2 (2015) variable and its time trend interaction term are both  
30  
31 statistically significant with a magnitude four times larger than the FCTC effect and 40  
32  
33 percent higher than the national policy effect. As shown from the coefficient and its  
34  
35 interaction term, the 2015 tobacco tax increase (Tax 2) essentially reduced per capita  
36  
37 monthly consumption by 0.43 pack initially and then continued to reduce consumption by  
38  
39 0.04 pack per capita per month over time.  
40  
41  
42  
43

44 The implementation of both tax increases (2009 and 2015) resulted in similar initial  
45  
46 effects and time trends. The initial effect of the second (2015) tax increase, aimed at  
47  
48 wholesale and retail prices, was about ten times the initial effect of the 2009 tax increase.  
49  
50

51 The trend effect of the 2015 policy was about four times the trend effect of the first tax  
52  
53  
54  
55  
56  
57  
58  
59



1  
2  
3 increase. In addition, unmeasured smoke-free model effects might have contributed to the  
4  
5 big impact of the 2015 tax increase.  
6

7  
8 This finding indicates that unless specific policies are targeted at smokers, generalized  
9  
10 policies advocating tobacco control may result in some immediate effects, but they won't  
11  
12 be able to change the consumption of tobacco over time.  
13

14  
15 Tax increases are much more effective at changing tobacco consumption than generalized  
16  
17 policies. This was true of even the first tax increase (in 2009), which was not reflected in  
18  
19 the retail price of cigarettes. When the tax increase was factored into the retail price (in  
20  
21 2015), the impact on cigarette consumption was much larger and was sustained over time.  
22

23  
24 Figure 2 presents China's average monthly packs of cigarettes consumed per capita per  
25  
26 year from 2000-2017 with and without accounting for tobacco control policies. Before  
27  
28 the FCTC policy was implemented, between 2000 and 2005, average consumption  
29  
30 increased from 5.1 packs to 6.3 packs per capita per month, an increase of 23.5% in six  
31  
32 years.  
33

34  
35 Between 2006 and 2013, monthly cigarette consumption grew from 6.4 packs to 7.7  
36  
37 packs, an increase of 20.3% in seven years. Consumption then began to decrease in 2013.  
38  
39 By the end of 2016, the average number of packs of cigarettes consumed monthly had  
40  
41 dropped from 7.7 to 7.2, a 6.5% decrease in three years. Without the tax increase, average  
42  
43 consumption was predicted at 8.6 packs, 16.3% higher than with the tax increase.  
44

45  
46 The 2013 policy announcements by the Chinese national government changed smoking-  
47  
48 related social norms. Combined with the global FCTC intervention and the first tax  
49  
50 increase (2009), the growing trend of cigarette consumption per month per capita in  
51  
52  
53  
54  
55  
56  
57  
58  
59  
60

China finally began to decline, and the second tax increase (2015) had a much bigger impact on the downward trend.

**Insert Figure 2 Here.**

Based on the model estimates, we calculated the total impact of various policies on the average number of packs of cigarettes consumed per month. Table 3 presents the percentage change in average monthly consumption of cigarettes, with and without tobacco control policies. The percentage effect is calculated as follows:

$$\% \text{ Change} = (Y^{\wedge}_{\text{policies}=1} - Y^{\wedge}_{\text{policies}=0}) / Y^{\wedge}_{\text{policies}=0}$$

**Table 3 Impact of tobacco control policies on average monthly cigarette consumption per capita**

| Policy Period           | Predicted Monthly Consumption in Packs of Cigarettes with Policies<br>( $Y^{\wedge}_{\text{policies}=1}$ ) | Predicted Monthly Consumption in Packs of Cigarettes without Policies<br>( $Y^{\wedge}_{\text{policies}=0}$ ) | % Change<br>( $Y^{\wedge}_{\text{policies}=1} - Y^{\wedge}_{\text{policies}=0} / Y^{\wedge}_{\text{policies}=0}$ ) | Incremental Change |
|-------------------------|------------------------------------------------------------------------------------------------------------|---------------------------------------------------------------------------------------------------------------|--------------------------------------------------------------------------------------------------------------------|--------------------|
| No Policies             | 5.680                                                                                                      | 5.680                                                                                                         | 0.00%                                                                                                              | 0.00%              |
| FCTC Only               | 6.737                                                                                                      | 6.754                                                                                                         | -0.25%                                                                                                             | -0.25%             |
| FCTC/Tax1               | 7.450                                                                                                      | 7.566                                                                                                         | -1.54%                                                                                                             | -1.29%             |
| FCTC/Tax1/National      | 7.668                                                                                                      | 8.202                                                                                                         | -6.51%                                                                                                             | -4.97%             |
| FCTC/Tax1/National/Tax2 | 7.176                                                                                                      | 8.598                                                                                                         | -16.54%                                                                                                            | -10.03%            |

Table 3 shows that during the 40-month period when only the FCTC policy was in effect (January 2006 through April 2009), average cigarette consumption dropped 0.25%, due mainly to the initial impact of the FCTC.

During the 54-month period that includes implementation of the FCTC and the first tax increase (May 2009 through October 2013), average consumption dropped 1.54%, and

the marginal effect of the 2009 tax increase was -1.29%, indicating a very limited effect when the tax increase was not factored into the retail price.

During the 18-month period following issuance of the national policies (November 2013 through April 2015), but prior to the second tax increase instituted in May 2015, the average consumption of cigarettes dropped 6.51%, and the national policy changes alone reduced monthly consumption by 4.97%.

After the second tax increase announced in May 2015, a big decline occurred in cigarette consumption. In the 26-month period following this tax increase (May 2015 through June 2017), the average consumption of cigarettes dropped 16.54%, due mainly to the effect of the second tax increase, which alone brought down average monthly consumption by 10.03%.

Table 4 presents the predicted effects of the four policies studied on cigarette consumption measured in million packs.

**Table 4 Impact of tobacco control policies on cigarettes consumption in million packs**

| Period               | FCTC  | 1st Taxation | National | 2nd Taxation | All Policies |
|----------------------|-------|--------------|----------|--------------|--------------|
| Jan 2006 to Apr 2009 | 893   | 0            | 0        | 0            | 893          |
| May 2009 to Oct 2013 | 1,377 | 7,106        | 0        | 0            | 8,484        |
| Nov 2013 to Apr 2015 | 505   | 2,606        | 10,042   | 0            | 13,153       |
| May 2015 to Jun 2017 | 771   | 3,980        | 15,336   | 30,949       | 51,036       |
| Total                | 3,547 | 13,693       | 25,377   | 30,949       | 73,567       |

Between January 2006 and June 2017, China consumed 1.348 trillion packs of cigarettes.

The reduction in total consumption attributable to the policy changes was 73.6 billion packs, which is 5.18% of the sales predicted without policy interventions.

Implementation of the FCTC decreased consumption by 3.5 billion packs, the first tax

1  
2  
3 increase (2009) reduced consumption by 13.7 billion, the national policy announcements  
4 decreased it by 25.4 billion packs, and the largest reduction came from the second tax  
5  
6 increase (2015), including unmeasured local smoke-free policies--almost 31 billion packs  
7  
8 in just 26 months.  
9

10  
11  
12 From announcement of the 2013 national policy change through June 2017, China  
13  
14 reduced the sales of cigarettes by 64.2 billion packs, a 12.57% reduction in the average  
15  
16 consumption of cigarettes in China.  
17

### 18 19 **Discussion**

20  
21 The World Health Organization's FCTC, an international treaty, aims to provide a  
22  
23 roadmap to address the global tobacco epidemic using effective measures and strategies.  
24  
25 China ratified the treaty in November 2005 and began implementation in January 2006.  
26  
27 Calculated from Table 3, this study finds that the impact of national policy changes has  
28  
29 been almost 20 times larger than the impact of the WHO's FCTC treaty itself, and that  
30  
31 national tobacco control policy changes in China have been a determining factor in  
32  
33 reversing the increasing trend of tobacco consumption. In other words, implementing an  
34  
35 international treaty requires national policy and social norm changes to achieve the goal  
36  
37 of reducing tobacco consumption. Ratification of the treaty alone without domestic policy  
38  
39 implementation will have a very minimal effect.  
40  
41  
42  
43

44  
45 The process of integrating global social norms with domestic policy change took exactly  
46  
47 10 years in China (November 2003 to November 2013).<sup>31</sup> Our study finds that after the  
48  
49 immediate effects of the policy changes were noted, the powerful STMA developed  
50  
51 countermeasures to dilute the impact of the policy changes. This finding confirms the  
52  
53  
54  
55  
56  
57  
58  
59  
60

1  
2  
3 challenges faced by and the persistence required for the global and national tobacco  
4 control communities.<sup>7 32</sup>

5  
6  
7  
8 Between 2006 and 2013, although the government raised the tobacco tax in May 2009,  
9  
10 the economic goal of increasing government revenue overpowered the social goal of  
11 reducing tobacco consumption. The tax increase did not result in higher cigarette prices  
12 for the consumer, thus minimizing the impact of this policy on consumption.<sup>17 33</sup>

13  
14  
15  
16  
17 When the 2015 tax policy raised retail cigarette prices, both immediate and trend effects  
18 were very significant, and the total marginal effect was 7.8 times that of the 2009 tax  
19 increase (the ratio is calculated as the marginal effect of tax2 which is the difference of  
20 FCTC/Tax1/National/Tax2 and FCTC/Tax1/National presented in table 3: -16.54% and -  
21 6.51%=-10.03%, and the marginal effect of tax1 is the difference of FCTC/Tax1 and  
22 FCTC Only: -1.54% and -0.25%=-1.29%. The ratio of marginal effect tax2 and tax1 is -  
23 10.03% and -1.29%=7.8). This finding indicates that tobacco control policies should be  
24 more robust and target consumers more directly through higher prices and tougher  
25 smoke-free regulations. Because China has no national smoke-free law, and the impact of  
26 various local smoke-free regulations on national cigarette consumption is difficult to  
27 measure, the impact of taxation policy includes unmeasured effects of local smoke-free  
28 policies.  
29  
30  
31  
32  
33  
34  
35  
36  
37  
38  
39  
40  
41  
42  
43

44 This study finds a significant positive income effect on consumption, which indicates that  
45 cigarettes have become more affordable. A recent study shows that between 2001 and  
46 2016, the affordability of cigarettes in China increased 1.85 times. It is important to  
47 continue to raise the tobacco tax to offset the affordability influence on cigarette  
48 consumption.<sup>25</sup>  
49  
50  
51  
52  
53  
54  
55  
56  
57  
58  
59  
60

1  
2  
3 This study shows empirically that raising the tobacco tax through increasing retail prices  
4 is the most effective tobacco control policy instrument among the few policies  
5  
6 implemented in China. Currently China has a relatively low cigarette tax rate, 56% of the  
7  
8 retail price.<sup>19</sup> The WHO guideline for an effective tobacco control benchmark is a tax rate  
9  
10 of 75% of the retail price.<sup>34</sup> Comparing China's tax rate with the WHO guideline reveals  
11  
12 that China has a lot of room to raise its tax on tobacco. Raising the price of cigarettes will  
13  
14 save lives, reduce smoking-related medical costs, and generate additional government  
15  
16 revenue.  
17  
18  
19

20  
21 This study has some limitations. During the study period, social norm of smoking has  
22  
23 changed significantly, because of the tobacco control policy changes, and increase of the  
24  
25 health awareness toward smoking. This change of social norm has not been incorporated  
26  
27 into the model estimates. The consumption of cigarette data are based on wholesales  
28  
29 rather than retail data.  
30  
31  
32

### 33 34 35 **Contributorship statement**

36  
37 Xiaoxin Xu: Conducted literature review, participated in data collection and manuscript  
38  
39 writing; Xiulan Zhang: Directed and verified data collection, estimated the models and  
40  
41 drafted the findings of the models and the discussions; Teh-wei Hu: Reviewed the models  
42  
43 and findings, participated in writing and discussions; Leonard S. Miller: Reviewed the  
44  
45 models ad findings, participated in drafting the main findings of the models; and  
46  
47 Mengnan Xu: Participated in data collection and verification, participated in literature  
48  
49 review.  
50  
51  
52  
53

### 54 55 **Competing Interest**

1  
2  
3 The authors declare that they have no competing interests.  
4  
5

## 6 **Funding**

7  
8 Bill & Melinda Gates Foundation  
9

### 10 *Role of the funding source*

11  
12  
13 The funder had no role in the study design, collection, analysis, or interpretation of the  
14 data, writing the manuscript, or the decision to submit the paper for publication. The  
15 corresponding author had full access to all data in the study and had final responsibility  
16 for the decision to submit for publication.  
17  
18  
19  
20  
21

## 22 **Data sharing statement**

23  
24  
25 Extra data is available by emailing Xiulan Zhang.  
26  
27  
28  
29

## 30 **References**

- 31  
32 1. The Bill China Cannot Afford: Health, Economic and Social Costs of China's Tobacco  
33 Epidemic. Manila: World Health Organization Regional Office for the Western  
34 Pacific, 2017.  
35  
36 2. Chen Z, Peto R, Zhou M, et al. Contrasting male and female trends in tobacco-  
37 attributed mortality in China: evidence from successive nationwide prospective  
38 cohort studies. *The Lancet* 2015;386(10002):1447-56. doi:  
39 [https://doi.org/10.1016/S0140-6736\(15\)00340-2](https://doi.org/10.1016/S0140-6736(15)00340-2)  
40  
41 3. Development of China's Tobacco Industry in 2000 (in Chinese). *China Tobacco*  
42 2001(4)  
43  
44 4. Analysis of China's Tobacco Market in 2016 (in Chinese). *China Tobacco* 2017(5):62-  
45 65.  
46  
47 5. Yang G. Introduction: China and the Negotiation of WHO FCTC. In: Yang G, ed.  
48 Tobacco control in China. Singapore: Springer 2018:1-16  
49  
50 6. Huang J. Public interest litigation and tobacco control in China. In: Yang G, ed.  
51 Tobacco control in China. Singapore: Springer 2018:119-40  
52  
53 7. Xiao D, Bai C-X, Chen Z-M, et al. Implementation of the World Health Organization  
54 Framework Convention on Tobacco Control in China: An arduous and long-term  
55 task. *Cancer* 2015;121(S17):3061-68. doi: 10.1002/cncr.29608  
56  
57 8. Yang G, Wang Y, Wu Y, et al. The road to effective tobacco control in China. *The*  
58 *Lancet* 2015;385(9972):1019-28. doi: [https://doi.org/10.1016/S0140-](https://doi.org/10.1016/S0140-6736(15)60174-X)  
59 [6736\(15\)60174-X](https://doi.org/10.1016/S0140-6736(15)60174-X)  
60

- 1
  - 2
  - 3
  - 4
  - 5
  - 6
  - 7
  - 8
  - 9
  - 10
  - 11
  - 12
  - 13
  - 14
  - 15
  - 16
  - 17
  - 18
  - 19
  - 20
  - 21
  - 22
  - 23
  - 24
  - 25
  - 26
  - 27
  - 28
  - 29
  - 30
  - 31
  - 32
  - 33
  - 34
  - 35
  - 36
  - 37
  - 38
  - 39
  - 40
  - 41
  - 42
  - 43
  - 44
  - 45
  - 46
  - 47
  - 48
  - 49
  - 50
  - 51
  - 52
  - 53
  - 54
  - 55
  - 56
  - 57
  - 58
  - 59
  - 60
9. Chen MH. Economic concerns hamper tobacco control in China. *The Lancet* 2007;370(9589):729-30. doi: 10.1016/S0140-6736(07)61359-2
10. Clarke H, Tan BJ. Tobacco Use Control Policies in China. *Economic Papers: A journal of applied economics and policy* 2011;30(4):490-96. doi: 10.1111/j.1759-3441.2011.00132.x
11. Pratt CB. China's tobacco industry's communication practices: Paradoxes and proposals for public policymaking. *Public Relations Review* 2011;37(3):318-20. doi: <https://doi.org/10.1016/j.pubrev.2011.03.010>
12. Huang Y. China's position in negotiating the Framework Convention on Tobacco Control and the revised International Health Regulations. *Public Health* 2014;128(2):161-66. doi: <https://doi.org/10.1016/j.puhe.2013.08.003>
13. Jin J. Why FCTC Policies Have Not Been Implemented in China: Domestic Dynamics and Tobacco Governance. *Journal of Health Politics, Policy and Law* 2014;39(3):633-66. doi: 10.1215/03616878-2682630
14. Zheng R, Gao S, Hu T-W. Tobacco Tax and Tobacco Control: Global Experience and Its application in China (in Chinese). *Finance & Trade Economics* 2013;34(3):44-53.
15. Ministry of Finance, State Administration of Taxation. Notice on Adjustment to Excise Tax on Tobacco Products(Taxation Document No.2009-84)(in Chinese), 2009.
16. Hu T-w, Mao Z, Shi J. Recent tobacco tax rate adjustment and its potential impact on tobacco control in China. *Tobacco Control* 2010;19(1):80-82.
17. Shi J, Hu T-w, Mao Z. Economic Effect Analysis of China's Tobacco Excise Tax Reform(in Chinese). *Review on Finance and Economics* 2011(1):52-59.
18. Gao S, Zheng R, Hu T-w. Can increases in the cigarette tax rate be linked to cigarette retail prices? Solving mysteries related to the cigarette pricing mechanism in China. *Tobacco Control* 2012;21(6):560-62.
19. Hu T-w, Zhang X, Zheng R. China has raised the tax on cigarettes: what's next? *Tobacco Control* 2015;25(6):609-11.
20. Zheng R, Wang Y, Hu X. Tobacco tax: theory, system design, and policy practice (in Chinese). *Financial Minds* 2016;1(6):5-30.
21. Mackay J. China: the tipping point in tobacco control. *British Medical Bulletin* 2016;120(1):15-25. doi: 10.1093/bmb/ldw043
22. Wedeman A. Xi Jinping's Hunt: Anti-Corruption Campaign or Factional Purge? *Modern China Studies* 2017;24(2):35-94.
23. World Bank. World Development Report 2012 : Gender Equality and Development. Washington, DC: The World Bank Group, 2012.
24. Wang L, Yan Y, Yi N, et al. Cigarette consumer price and affordability in China: results from 2015 China adult survey. *Chinese Journal of Epidemiology* 2017;38(1):69-72.
25. Zheng R, Wang Y, Hu X, et al. Cigarette Affordability in China: 2001-2016. Washington, DC.: World Bank, 2017.
26. Hu TW, Sung HY, Keeler TE. Reducing cigarette consumption in California: tobacco taxes vs an anti-smoking media campaign. *American Journal of Public Health* 1995;85(9):1218-22. doi: 10.2105/ajph.85.9.1218



- 1  
2  
3 27. McDowall D, McCleary R, Meidinger EE, et al. Interrupted Time Series Analysis.  
4 Thousand Oaks, CA: Sage Publications, Inc 1980.  
5  
6 28. Wagner AK, Soumerai SB, Zhang F, et al. Segmented regression analysis of  
7 interrupted time series studies in medication use research. *Journal of Clinical*  
8 *Pharmacy and Therapeutics* 2002;27(4):299-309. doi: doi:10.1046/j.1365-  
9 2710.2002.00430.x  
10  
11 29. Wagner AK, Soumerai SB, Zhang F, et al. Segmented regression analysis of  
12 interrupted time series studies in medication use research. *Journal of Clinical*  
13 *Pharmacy & Therapeutics* 2002;27(4):299-309.  
14  
15 30. Nistal-Nuño B. Segmented regression analysis of interrupted time series data to  
16 assess outcomes of a South American road traffic alcohol policy change. *Public*  
17 *Health* 2017;150(Supplement C):51-59. doi:  
18 <https://doi.org/10.1016/j.puhe.2017.04.025>  
19  
20 31. Eight years' implementation of World Health Organization Framework Convention on  
21 Tobacco Control(in Chinese) 2013 [Available from:  
22 [http://www.chinacdc.cn/jkzt/jkcj/sthd\\_3844/slhd\\_4153/201305/t20130515\\_80977](http://www.chinacdc.cn/jkzt/jkcj/sthd_3844/slhd_4153/201305/t20130515_80977.htm)  
23 [.htm](http://www.chinacdc.cn/jkzt/jkcj/sthd_3844/slhd_4153/201305/t20130515_80977.htm) accessed 12-31 2017.  
24  
25 32. Hu T-W, Lee AH, Mao Z. WHO Framework Convention on Tobacco Control in  
26 China: barriers, challenges and recommendations. *Global Health Promotion*  
27 2013;20(4):13-22. doi: 10.1177/1757975913501910  
28  
29 33. Gao S, Zheng R. Price, Tax and Cigarette Smoking: Simulations of China's Tobacco  
30 Tax Policy. *Frontiers of Economics in China* 2012;7(4):604-26. doi:  
31 doi:<https://doi.org/10.3868/s060-001-012-0028-2>  
32  
33 34. World Health Organization. WHO Technical Manual on Tobacco Tax  
34 Administration. Geneva, Switzerland: World Health Organization, 2010.  
35  
36  
37  
38  
39  
40  
41  
42  
43  
44  
45  
46  
47  
48  
49  
50  
51  
52  
53  
54  
55  
56  
57  
58  
59  
60

1  
2  
3  
4  
5  
6  
7  
8  
9  
10  
11  
12  
13  
14  
15  
16  
17  
18  
19  
20  
21  
22  
23  
24  
25  
26  
27  
28  
29  
30  
31  
32  
33  
34  
35  
36  
37  
38  
39  
40  
41  
42  
43  
44  
45  
46  
47  
48  
49  
50  
51  
52  
53  
54  
55  
56  
57  
58  
59  
60

**Figure 1 Timeline of tobacco control policies in China**

For peer review only

1  
2  
3 **Figure 2 Estimated monthly average packs of cigarettes consumed in China per**  
4 **capita with and without accounting for tobacco control policies, 2000-2017. Dotted**  
5 **red line (without policy), trend without tobacco control policies; Blue line(with**  
6 **policy), trend with tobacco control policies. Both lines are predicted values from the**  
7 **time-series model parameters.**  
8  
9  
10  
11  
12  
13  
14  
15  
16  
17  
18  
19  
20  
21  
22  
23  
24  
25  
26  
27  
28  
29  
30  
31  
32  
33  
34  
35  
36  
37  
38  
39  
40  
41  
42  
43  
44  
45  
46  
47  
48  
49  
50  
51  
52  
53  
54  
55  
56  
57  
58  
59  
60

For peer review only

1  
2  
3  
4  
5  
6  
7  
8  
9  
10  
11  
12  
13  
14  
15  
16  
17  
18  
19  
20  
21  
22  
23  
24  
25  
26  
27  
28  
29  
30  
31  
32  
33  
34  
35  
36  
37  
38  
39  
40  
41  
42  
43  
44  
45  
46  
47  
48  
49  
50  
51  
52  
53  
54  
55  
56  
57  
58  
59  
60

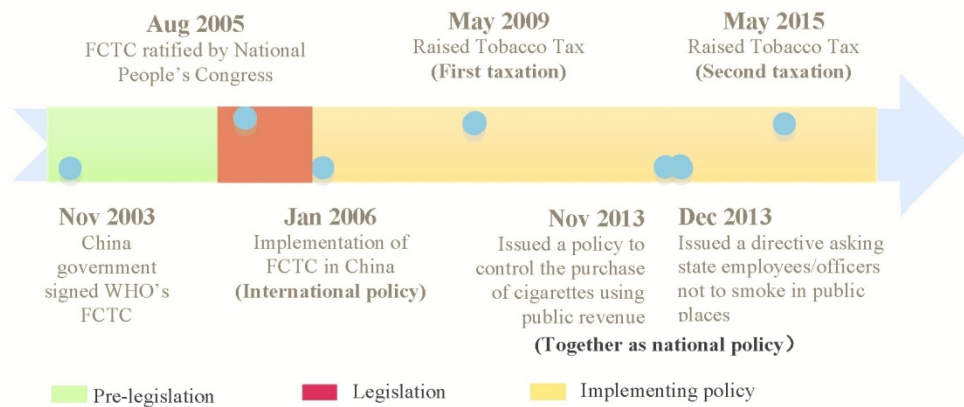

Figure 1 Timeline of tobacco control policies in China

461x196mm (96 x 96 DPI)

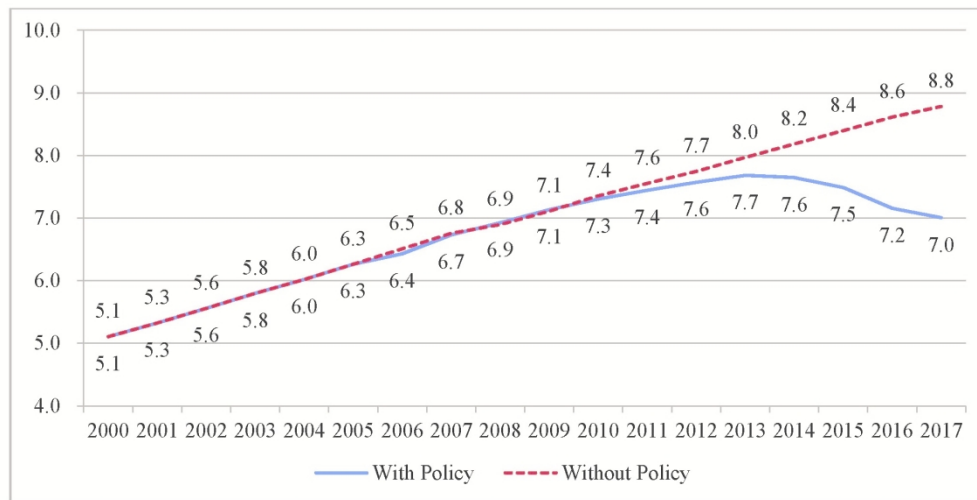

Figure 2 Estimated monthly average packs of cigarettes consumed in China per capita with and without accounting for tobacco control policies, 2000-2017. Dotted red line (without policy), trend without tobacco control policies; Blue line(with policy), trend with tobacco control policies. Both lines are predicted values from the time-series model parameters.

546x284mm (96 x 96 DPI)

STROBE Statement—checklist of items that should be included in reports of observational studies  
(Shown in form of a/b, a means page number, and b means line number; n/a means not applicable.)

|                              | Item No | Recommendation                                                                                                                                                                                                                                                                                                                                                                                                                                                                                                                                                                                                                                                                                                            |
|------------------------------|---------|---------------------------------------------------------------------------------------------------------------------------------------------------------------------------------------------------------------------------------------------------------------------------------------------------------------------------------------------------------------------------------------------------------------------------------------------------------------------------------------------------------------------------------------------------------------------------------------------------------------------------------------------------------------------------------------------------------------------------|
| <b>Title and abstract</b>    | 1       | (a) Indicate the study's design with a commonly used term in the title or the abstract ( 1/4-7, 3/15-33 )<br>(b) Provide in the abstract an informative and balanced summary of what was done and what was found(3/35-52&4/3-6)                                                                                                                                                                                                                                                                                                                                                                                                                                                                                           |
| <b>Introduction</b>          |         |                                                                                                                                                                                                                                                                                                                                                                                                                                                                                                                                                                                                                                                                                                                           |
| Background/rationale         | 2       | Explain the scientific background and rationale for the investigation being reported(6/24-8/22)                                                                                                                                                                                                                                                                                                                                                                                                                                                                                                                                                                                                                           |
| Objectives                   | 3       | State specific objectives, including any prespecified hypotheses(8/24-38)                                                                                                                                                                                                                                                                                                                                                                                                                                                                                                                                                                                                                                                 |
| <b>Methods</b>               |         |                                                                                                                                                                                                                                                                                                                                                                                                                                                                                                                                                                                                                                                                                                                           |
| Study design                 | 4       | Present key elements of study design early in the paper (n/a)                                                                                                                                                                                                                                                                                                                                                                                                                                                                                                                                                                                                                                                             |
| Setting                      | 5       | Describe the setting, locations, and relevant dates, including periods of recruitment, exposure, follow-up, and data collection(n/a)                                                                                                                                                                                                                                                                                                                                                                                                                                                                                                                                                                                      |
| Participants                 | 6       | (a) <i>Cohort study</i> —Give the eligibility criteria, and the sources and methods of selection of participants. Describe methods of follow-up(n/a)<br><i>Case-control study</i> —Give the eligibility criteria, and the sources and methods of case ascertainment and control selection. Give the rationale for the choice of cases and controls(n/a)<br><i>Cross-sectional study</i> —Give the eligibility criteria, and the sources and methods of selection of participants(n/a)<br>(b) <i>Cohort study</i> —For matched studies, give matching criteria and number of exposed and unexposed(n/a)<br><i>Case-control study</i> —For matched studies, give matching criteria and the number of controls per case(n/a) |
| Variables                    | 7       | Clearly define all outcomes, exposures, predictors, potential confounders, and effect modifiers. Give diagnostic criteria, if applicable(8/45-10/39)                                                                                                                                                                                                                                                                                                                                                                                                                                                                                                                                                                      |
| Data sources/<br>measurement | 8*      | For each variable of interest, give sources of data and details of methods of assessment (measurement). Describe comparability of assessment methods if there is more than one group(8/45-10/13)                                                                                                                                                                                                                                                                                                                                                                                                                                                                                                                          |
| Bias                         | 9       | Describe any efforts to address potential sources of bias(n/a)                                                                                                                                                                                                                                                                                                                                                                                                                                                                                                                                                                                                                                                            |
| Study size                   | 10      | Explain how the study size was arrived at(n/a)                                                                                                                                                                                                                                                                                                                                                                                                                                                                                                                                                                                                                                                                            |
| Quantitative variables       | 11      | Explain how quantitative variables were handled in the analyses. If applicable, describe which groupings were chosen and why(8/45-9/17)                                                                                                                                                                                                                                                                                                                                                                                                                                                                                                                                                                                   |
| Statistical methods          | 12      | (a) Describe all statistical methods, including those used to control for confounding(10/48-11/24)<br>(b) Describe any methods used to examine subgroups and interactions(n/a)<br>(c) Explain how missing data were addressed(n/a)<br>(d) <i>Cohort study</i> —If applicable, explain how loss to follow-up was addressed<br><i>Case-control study</i> —If applicable, explain how matching of cases and controls was addressed(n/a)<br><i>Cross-sectional study</i> —If applicable, describe analytical methods taking account of sampling strategy(n/a)<br>(e) Describe any sensitivity analyses(n/a)                                                                                                                   |

Continued on next page

| <b>Results</b>           |     |                                                                                                                                                                                                                                                                                                                                                                                                                                                        |
|--------------------------|-----|--------------------------------------------------------------------------------------------------------------------------------------------------------------------------------------------------------------------------------------------------------------------------------------------------------------------------------------------------------------------------------------------------------------------------------------------------------|
| Participants             | 13* | (a) Report numbers of individuals at each stage of study—eg numbers potentially eligible, examined for eligibility, confirmed eligible, included in the study, completing follow-up, and analysed(n/a)<br>(b) Give reasons for non-participation at each stage(n/a)<br>(c) Consider use of a flow diagram(n/a)                                                                                                                                         |
| Descriptive data         | 14* | (a) Give characteristics of study participants (eg demographic, clinical, social) and information on exposures and potential confounders(n/a)<br>(b) Indicate number of participants with missing data for each variable of interest(n/a)<br>(c) <i>Cohort study</i> —Summarise follow-up time (eg, average and total amount)(n/a)                                                                                                                     |
| Outcome data             | 15* | <i>Cohort study</i> —Report numbers of outcome events or summary measures over time(n/a)<br><i>Case-control study</i> —Report numbers in each exposure category, or summary measures of exposure(n/a)<br><i>Cross-sectional study</i> —Report numbers of outcome events or summary measures(n/a)                                                                                                                                                       |
| Main results             | 16  | (a) Give unadjusted estimates and, if applicable, confounder-adjusted estimates and their precision (eg, 95% confidence interval). Make clear which confounders were adjusted for and why they were included(11/38-12/23, 15/26-42)<br>(b) Report category boundaries when continuous variables were categorized(n/a)<br>(c) If relevant, consider translating estimates of relative risk into absolute risk for a meaningful time period(16/33-17/18) |
| Other analyses           | 17  | Report other analyses done—eg analyses of subgroups and interactions, and sensitivity analyses(n/a)                                                                                                                                                                                                                                                                                                                                                    |
| <b>Discussion</b>        |     |                                                                                                                                                                                                                                                                                                                                                                                                                                                        |
| Key results              | 18  | Summarise key results with reference to study objectives(17/22-43)                                                                                                                                                                                                                                                                                                                                                                                     |
| Limitations              | 19  | Discuss limitations of the study, taking into account sources of potential bias or imprecision. Discuss both direction and magnitude of any potential bias(19/22-31)                                                                                                                                                                                                                                                                                   |
| Interpretation           | 20  | Give a cautious overall interpretation of results considering objectives, limitations, multiplicity of analyses, results from similar studies, and other relevant evidence(17/45-19/20)                                                                                                                                                                                                                                                                |
| Generalisability         | 21  | Discuss the generalisability (external validity) of the study results(n/a)                                                                                                                                                                                                                                                                                                                                                                             |
| <b>Other information</b> |     |                                                                                                                                                                                                                                                                                                                                                                                                                                                        |
| Funding                  | 22  | Give the source of funding and the role of the funders for the present study and, if applicable, for the original study on which the present article is based(20/9-21)                                                                                                                                                                                                                                                                                 |

\*Give information separately for cases and controls in case-control studies and, if applicable, for exposed and unexposed groups in cohort and cross-sectional studies.

**Note:** An Explanation and Elaboration article discusses each checklist item and gives methodological background and published examples of transparent reporting. The STROBE checklist is best used in conjunction with this article (freely available on the Web sites of PLoS Medicine at <http://www.plosmedicine.org/>, Annals of Internal Medicine at <http://www.annals.org/>, and Epidemiology at <http://www.epidem.com/>). Information on the STROBE Initiative is available at [www.strobe-statement.org](http://www.strobe-statement.org).

# BMJ Open

## Effects of global and domestic tobacco control policies on cigarette consumption per capita: An evaluation using monthly data in China

|                                 |                                                                                                                                                                                                                                                                                                                                                                                                                                       |
|---------------------------------|---------------------------------------------------------------------------------------------------------------------------------------------------------------------------------------------------------------------------------------------------------------------------------------------------------------------------------------------------------------------------------------------------------------------------------------|
| Journal:                        | <i>BMJ Open</i>                                                                                                                                                                                                                                                                                                                                                                                                                       |
| Manuscript ID                   | bmjopen-2018-025092.R2                                                                                                                                                                                                                                                                                                                                                                                                                |
| Article Type:                   | Research                                                                                                                                                                                                                                                                                                                                                                                                                              |
| Date Submitted by the Author:   | 30-Mar-2019                                                                                                                                                                                                                                                                                                                                                                                                                           |
| Complete List of Authors:       | Xu, Xiaoxin; Beijing Normal University, School of Social Development and Public Policy<br>Zhang, Xiulan; Beijing Normal University, School of Social Development and Public Policy<br>Hu, Teh-wei; Public Health Institute, Center for International Tobacco Control<br>Miller, Leonard; University of California, School of Social Welfare<br>XU, Mengnan; Beijing Normal University, School of Social Development and Public Policy |
| <b>Primary Subject Heading</b>: | Smoking and tobacco                                                                                                                                                                                                                                                                                                                                                                                                                   |
| Secondary Subject Heading:      | Global health, Health economics, Health policy                                                                                                                                                                                                                                                                                                                                                                                        |
| Keywords:                       | global health, smoking, global and domestic health policies, China, tobacco control                                                                                                                                                                                                                                                                                                                                                   |
|                                 |                                                                                                                                                                                                                                                                                                                                                                                                                                       |

SCHOLARONE™  
Manuscripts



1  
2  
3  
4 **Effects of global and domestic tobacco control policies on cigarette**  
5  
6  
7 **consumption per capita: An evaluation using monthly data in China**  
8  
9

10 **Word Count: 3882**  
11

12  
13 Xu Xiaoxin, Xiulan Zhang, Teh-wei Hu, Leonard Miller, Mengnan Xu  
14

15  
16 **Authors**  
17

18 Xiaoxin Xu, Ph.D.,  
19

20 School of Social Development and Public Policy,  
21

22 Beijing Normal University, China  
23

24 Email: xuxiaoxin@bnu.edu.cn  
25  
26  
27  
28

29 Xiulan Zhang, Ph.D.,  
30

31 School of Social Development and Public Policy,  
32

33 Beijing Normal University, China  
34

35 Email: zhang99@bnu.edu.cn  
36  
37  
38  
39

40 Teh-wei Hu, Ph.D.,  
41

42 Center for International Tobacco Control,  
43

44 Public Health Institute, Oakland, CA, USA  
45

46 Email: thu@berkeley.edu  
47  
48  
49

50 Leonard S. Miller, Ph.D.,  
51

52 School of Social Welfare,  
53  
54  
55  
56  
57  
58  
59  
60

1  
2  
3 University of California, Berkeley, CA, USA  
4

5 Email: lsmiller2331@gmail.com  
6  
7  
8  
9

10 Mengnan Xu, B.S.,

11  
12 School of Social Development and Public Policy,  
13

14 Beijing Normal University, China  
15

16  
17 Email: pumpkinggg@126.com  
18  
19  
20

21 **Correspondence:** Xiulan Zhang,  
22

23 School of Social Development and Public Policy, Beijing Normal University, Beijing,  
24

25 China, 19 Xijiekouwai Street, Haidian District, Beijing, 100875, China. Tel: (86-10)  
26

27 5880-1512; Fax: (86-10) 5880-0366; Email: zhang99@bnu.edu.cn  
28  
29  
30  
31  
32  
33  
34  
35  
36  
37  
38  
39  
40  
41  
42  
43  
44  
45  
46  
47  
48  
49  
50  
51  
52  
53  
54  
55  
56  
57  
58  
59  
60

## Abstract

**Introduction** China consumes 44% of the world's cigarettes. Robust tobacco control measures are needed to contain the trend of increasing cigarette consumption. This paper examines the effectiveness of policy interventions introduced in China on reducing the country's tobacco use.

**Methods** The paper uses data on China's monthly cigarette consumption per capita from January 2000 to June 2017 to estimate the impact of specific policies on China's tobacco consumption. Tobacco consumption is calculated from monthly sales data from the China National Tobacco Corporation and demographic data from the China National Bureau of Statistics. The policies studied include the World Health Organization (WHO) Framework Convention on Tobacco Control (FCTC), national tobacco-related policy changes, and two tobacco tax increases implemented in China during the study period. Segmented regression analysis is used to estimate the immediate effects of the policies studied and changes in the time trends resulted from these policy changes.

**Findings** The impact of national policy changes in China is almost 20 times greater than the impact of the WHO FCTC treaty itself, and national policy changes in tobacco control are a determining factor in reversing the trend of increasing tobacco consumption in China. The 2015 tax increase, which raised retail cigarette prices, produced both immediate and trend effects, with a total incremental effect 7.8 times that of the 2009 tax increase, which did not result in higher cigarette prices for the consumer.

**Interpretations** Translating global tobacco control policies into domestic policies will generate a much greater impact on reducing average cigarette consumption, and tobacco

1  
2  
3 taxes that are reflected in the retail prices of cigarettes will be more effective in reducing  
4  
5 cigarette consumption.  
6  
7  
8  
9

### 10 **Strengths and limitations of this study**

- 11 1. To the best of our knowledge, this study is the first systematic evaluation of the  
12 impact of both domestic and global tobacco control policies on tobacco consumption  
13 in China.  
14
- 15 2. The study compares the effectiveness of the global FCTC and domestic policies in  
16 reducing cigarette consumption in China over a period of 17.5 years.  
17
- 18 3. The data used for the policy evaluation cover the periods from no tobacco control  
19 policies in China to the implementation of FCTC policies to the changed national  
20 policies to the specific tax increases enacted in China in 2009 and 2015.  
21
- 22 4. Using the interrupted time series model, the study examines not only the immediate  
23 impact of each policy on tobacco consumption, but also its impact on tobacco  
24 consumption trend.  
25
- 26 5. The limitations of this study are that the social norm change has not been  
27 incorporated into the models, and the cigarette consumption is based on wholesales  
28 rather than retails.  
29  
30  
31  
32  
33  
34  
35  
36  
37  
38  
39  
40  
41  
42  
43  
44  
45  
46  
47  
48  
49  
50  
51  
52  
53  
54  
55  
56  
57  
58  
59  
60

## Introduction

The 315 million smokers in China consume 44% of the world's cigarettes, and their average consumption is 2.3 times the world average.<sup>1</sup> Tobacco use increases medical expenses by billions.<sup>1</sup> Each year, one million people in China, many of them young, die of tobacco-related diseases.<sup>2</sup> China's rapid economic development in the past 40 years has been accompanied by significant growth in the country's total cigarette consumption. In 2000, the China National Tobacco Corporation (CNTC), the state-owned tobacco monopoly, sold 76.92 billion packs of cigarettes;<sup>3</sup> by 2014, the number had grown to 127.48 billion packs,<sup>4</sup> an increase of 65.8 %.

China signed the World Health Organization (WHO) Framework Convention on Tobacco Control (FCTC) in 2003; the China National People's Congress (CNPC) ratified the treaty in 2005, and China began implementing the FCTC in 2006, indicating that China's government would fulfill its legal obligation in accordance with the treaty.<sup>5</sup> The ratification and implementation of the FCTC provided a moral and legal high ground for advocates on tobacco control<sup>6</sup>, although the implementation of specific articles still had a long way to go.<sup>7</sup> In this paper, we refer to the WHO FCTC as an international policy. While the Chinese government has made some effort to control tobacco use, strong interference from the China State Tobacco Monopoly Administration (STMA), which owns CNTC and favors economic concerns over social concerns, has led to slow development and implementation of the full tobacco control policy measures.<sup>8-13</sup>

Between 2006 and 2015, China increased tobacco taxes twice. The first tax increase was introduced in May 2009 and was not reflected directly in cigarette retail prices. As a result, the increase had minimal immediate impact on consumers; it might have more

1  
2  
3 long term impact by changing cigarette product structure and consequent raising of  
4 average price.<sup>14</sup> The 2009 adjustment raised the ad valorem tax from 45% to 56% at the  
5  
6 producer price level for class A cigarettes and from 30% to 36% for class B cigarettes.  
7  
8  
9  
10 The new policy also introduced a new 5% ad valorem tax at the wholesale price level.<sup>15 16</sup>  
11  
12 The intent of this 2009 adjustment was to raise government revenue from CNTC, China's  
13 tobacco producer, not to serve as a tobacco control policy instrument. Under the new  
14  
15 scheme, the government forbade changes in the retail prices of cigarettes.<sup>16-18</sup> The policy  
16  
17 was introduced primarily to counteract the impact of the global financial crisis on  
18  
19 government revenue. Between January and April 2009, China's public revenue decreased  
20  
21 9.9% while public spending increased 31.7%.<sup>19</sup> The financial pressure prompted the  
22  
23 government to raise the tobacco tax. In other words, this policy was driven by an  
24  
25 economic goal, and because the policy forbade the tobacco industry from adding the tax  
26  
27 increase to the retail price of cigarettes, the social goal was not considered at all.<sup>16 17</sup>  
28  
29  
30  
31 This outcome was possible because of the unique cigarette pricing mechanism under  
32  
33 China's tobacco monopoly system. Both the cigarette allocation price, the price at which  
34  
35 the tobacco producers offer cigarettes to the wholesalers, and the wholesale price, the  
36  
37 price at which the wholesalers offer cigarettes to retailers, are controlled by STMA. In  
38  
39 2009's tobacco tax adjustment, STMA reduced the wholesale profit margin but  
40  
41 maintained the retail price unchanged. In this sense, the 2009 tobacco tax adjustment  
42  
43 could be regarded as a profit tax adjustment rather than an excise tax adjustment. The  
44  
45 second tobacco tax increase occurred in May 2015. Unlike the 2009 tax adjustment, the  
46  
47 2015 adjustment moved the increase from the tax base at the wholesale price level to the  
48  
49 retail price level, a significant step away from the 2009 increase and toward China's  
50  
51  
52  
53  
54  
55  
56  
57  
58  
59  
60

1  
2  
3 tobacco control agenda.<sup>20</sup> The 2015 tax increase initiated a 0.10 RMB (0.0146 USD)  
4  
5 tax per pack at the wholesale price level and increased the ad valorem tax from 5% to  
6  
7 11%, a 6% point increase also at the wholesale price level. However, this time, the  
8  
9 Chinese government allowed the tobacco industry to shift this new tax increase to the  
10  
11 retail price, resulting in an estimated 10% increase in the retail price of cigarettes.<sup>21</sup>  
12  
13  
14 China's new administration came into power in 2013. With support from its top leader,  
15  
16 China's policy direction of tobacco control began to change.<sup>8 22 23</sup>The national policy  
17  
18 change began with the anti-corruption campaign, which was aimed at the problem of  
19  
20 corruption within the party, state, and business sectors.<sup>24</sup> In November 2013, the  
21  
22 government forbade the purchase of cigarettes using public revenue. A month later,  
23  
24 additional policies were announced that prohibited state employees/officials from  
25  
26 smoking in public places. This significant policy initiative can be considered as a major  
27  
28 government effort to change the social norm of smoking habits in China. Figure 1 shows  
29  
30 the timeline of major tobacco control policies in China.  
31  
32  
33  
34  
35  
36  
37

38 **Insert Figure 1 Here**  
39  
40  
41

42  
43 One factor that has influenced the trend of increased cigarette consumption in China is  
44  
45 the rapid growth of personal income. China has experienced the largest economic  
46  
47 transformation in human history. Based on data from the China National Bureau of  
48  
49 Statistics (<http://data.stats.gov.cn/ks.htm?cn=C01&zb=A0501>), following the 1978  
50  
51 economic reform, the Chinese economy grew around 9.5% each year, becoming the  
52  
53 second largest economy in the world according to a World Bank report.<sup>25</sup> In recent years,  
54  
55  
56  
57  
58  
59  
60

1  
2  
3 China's economic performance has remained at a relatively high level of 7% growth.

4  
5 While the income of people in China also has increased significantly, an increase in  
6  
7  
8 cigarette prices has not accompanied the GDP growth, thus making cigarettes more  
9  
10 affordable over time.<sup>26 27</sup>

11  
12 Waiting for China to take robust measures to control its tobacco use, change the social  
13  
14 norm and policy landscape, reduce the institutional barriers created by STMA, and  
15  
16 counteract the increased consumption of cigarettes resulting from income growth is a  
17  
18 long and frustrating process.

19  
20  
21 The purpose of this paper is to estimate the relative impacts of four tobacco control policy  
22  
23 interventions on tobacco consumption in China: first ever international public health  
24  
25 treaty, WHO FCTC, the government's 2013 national policy forbidding using general  
26  
27 revenue to purchase cigarettes and smoking in public by state employees/officials, and  
28  
29 the tax increases of 2009 and 2015, respectively. This is the first study to estimate the  
30  
31 combined impact of international and domestic tobacco control policy changes on long-  
32  
33 term trends in tobacco consumption in China.

## 34 35 36 37 **Methods**

### 38 39 40 ***Data***

41  
42 We used the monthly data on cigarette sales from January 2000 to June 2017, a total of  
43  
44 210 months of data reported by CNTC. Sales data, collected by CNTC, are based on the  
45  
46 purchases of retailers, so the exact monthly sales are determined by the dates when  
47  
48 retailers buy from cigarette distributors. We extracted these data from *China Tobacco*  
49  
50 *Magazine* and its website (<http://www.echinatobacco.com>), hosted by CNTC.  
51  
52  
53  
54  
55  
56  
57  
58  
59  
60



1  
2  
3 The population data were based on the China Statistical Yearbook, extracted from the  
4 website of the China National Bureau of Statistics (<http://www.stats.gov.cn/tjsj/ndsj/#>).  
5  
6 Between 2000 and 2016, China's total population increased by 9.1%. To adjust for the  
7 effect of population growth on cigarette sales, this study uses the average packs of  
8 cigarettes consumed each month per capita.<sup>28</sup> To estimate policy impacts, we include the  
9  
10 GDP growth rate, the timing of policy interventions, and trends initiated by each of the  
11 four policy interventions studied here.  
12  
13  
14  
15  
16  
17  
18

19 During the study period, several tobacco control policies were implemented in China. As  
20 discussed in the introduction section, the first was the ratification of WHO FCTC, the  
21 implementation of which began in January 2006. In May 2009, China raised cigarette  
22 taxes, but the increase was not reflected in the retail price. In 2013, tobacco control  
23 received top leadership support. In November, a national policy was issued forbidding  
24 government funds from being used to purchase cigarettes for officials, and a month later,  
25 in December, the Central Committee of the Communist Party of China (CCCPC) and the  
26 State Council jointly issued a policy prohibiting state employees/officials from smoking  
27 in public places. This national policy targeted state officials and government agencies. In  
28 May 2015, China again raised cigarette taxes and allowed retail prices to rise.  
29  
30  
31  
32  
33  
34  
35  
36  
37  
38  
39  
40  
41

42 Since the implementation of WHO FCTC, smoke-free policies have been established in  
43 different cities or regions of China. The Beijing Municipal Government passed the  
44 strictest smoke-free regulation in May 2015. But a national smoke-free law has not yet  
45 been passed. Therefore, the effect of smoke-free policies is an unmeasured effect in the  
46 model.  
47  
48  
49  
50  
51  
52  
53  
54  
55  
56  
57  
58  
59  
60

We divided the analysis into five time periods: (1) before the FCTC was implemented (January 2000 to December 2005); (2) between implementation of the FCTC and the first tax policy adjustment (January 2006 to April 2009); (3) between the first tax policy adjustment and implementation of the national policy change (May 2009 to October 2013); (4) between implementation of the national policy change and the second tax policy adjustment (November 2013 to April 2015); and (5) the period after all policies were implemented (May 2015 to June 2017).

Table 1 presents descriptive statistics of the GDP growth rates and average packs of cigarettes consumed during each of the five periods studied.

**Table 1 Average cigarette consumption and GDP growth in different periods**

| Period               | Policies                | Number of Months | Average Consumption (Pack/month/per capita) | Average GDP Growth (%) |
|----------------------|-------------------------|------------------|---------------------------------------------|------------------------|
| Jan 2000 to Dec 2005 | No Policies             | 72               | 5.66 (0.57)                                 | 9.54 (1.06)            |
| Jan 2006 to Apr 2009 | FCTC Only               | 40               | 6.78 (1.22)                                 | 11.86 (2.02)           |
| May 2009 to Oct 2013 | FCTC/Tax1               | 54               | 7.43 (1.83)                                 | 8.87 (1.11)            |
| Nov 2013 to Apr 2015 | FCTC/Tax1/National      | 18               | 7.69 (2.14)                                 | 7.32 (0.25)            |
| May 2015 to Jun 2017 | FCTC/Tax1/National/Tax2 | 26               | 7.20 (1.56)                                 | 6.81 (0.10)            |

The GDP growth rates during the 17 years for which we have data reached 14.16% in 2007 and then dropped to 6.7% in 2016. The average growth rate over the analysis period was 9.36%. The decline in GDP growth rates began in 2012.

### ***Patient and Public Involvement***

There is no patient and public involvement in data collection.

### ***Statistical Analysis***

Segmented regression analysis of interrupted time series is an effective statistical method to evaluate longitudinal effects of time-delimited interventions,<sup>29</sup> and it is widely used in

1  
2  
3 assessing policy impact especially where randomization is not feasible.<sup>30</sup> In this model,  
4  
5 two parameters are estimated for each intervention studied: level and trend. The level  
6  
7 parameter defines the y-intercept, which is the immediate effect of the intervention on the  
8  
9 outcome. The time trend interaction with the intervention variable is the rate of change  
10  
11 (the slope), which measures the gradual change of the outcomes due to the intervention.  
12  
13

14 30 31

15  
16  
17 We estimated the segmented regression model using SAS AUTOREG procedures to  
18  
19 assess the longitudinal impact of tobacco control policies on the average cigarette  
20  
21 consumption per month per capita. We estimated levels and trends of the four  
22  
23 interventions: FCTC (2005), first taxation (2009), national policies (2013), and second  
24  
25 taxation (2015). The monthly pattern of sales was adjusted by the AR parameters in  
26  
27 AUTOREG procedure.  
28  
29

### 30 31 **Results**

32  
33 Table 2 presents an estimation of the model describing average sales of packs of  
34  
35 cigarettes consumed per person per month. Overall, the model is very significant with a  
36  
37 total R-squared of 0.9416. The transformed R-squared is 0.995, indicating an extremely  
38  
39 high fit of the model and the existence of autocorrelation.  
40  
41

42 **Table 2 Auto-regression model estimate of the per capita monthly cigarette**  
43 **consumption**

| 44 <b>Maximum-Likelihood Estimates of the Model</b> |         |              |        |
|-----------------------------------------------------|---------|--------------|--------|
| 45 SSE                                              | 30.94   | DFE          | 187    |
| 46 MSE                                              | 0.165   | Root MSE     | 0.407  |
| 47 SBC                                              | 338.86  | AIC          | 261.88 |
| 48 MAE                                              | 0.27    | AICC         | 267.81 |
| 49 MAPE                                             | 4.04    | HQC          | 293.00 |
| 50 Log Likelihood                                   | -107.94 | Observations | 210    |
| 51 Total R <sup>2</sup>                             |         |              | 0.9416 |
| 52 Transformed R <sup>2</sup>                       |         |              | 0.9950 |
| 53 <b>Parameter Estimates</b>                       |         |              |        |

| Variable      | Estimate | t Value | Pr >  t |
|---------------|----------|---------|---------|
| Intercept     | 4.8353   | 70.45   | <.0001  |
| GDP Growth    | 0.0180   | 2.10    | 0.0371  |
| Time          | 0.0184   | 32.99   | <.0001  |
| FCTC          | -0.1101  | -2.53   | 0.0121  |
| FCTC_time     | 0.0046   | 2.37    | 0.0189  |
| Tax1          | -0.0462  | -1.38   | 0.1686  |
| Tax1_time     | -0.0097  | -7.55   | <.0001  |
| National      | -0.3056  | -5.63   | <.0001  |
| National_time | 0.0078   | 1.72    | 0.0871  |
| Tax2          | -0.4309  | -6.39   | <.0001  |
| Tax2_time     | -0.0382  | -8.30   | <.0001  |
| AR1           | 0.6277   | 8.87    | <.0001  |
| AR2           | 0.5907   | 8.04    | <.0001  |
| AR3           | 0.5834   | 7.83    | <.0001  |
| AR4           | 0.5588   | 7.33    | <.0001  |
| AR5           | 0.5435   | 7.00    | <.0001  |
| AR6           | 0.5458   | 6.85    | <.0001  |
| AR7           | 0.5412   | 6.72    | <.0001  |
| AR8           | 0.5397   | 6.72    | <.0001  |
| AR9           | 0.5546   | 6.98    | <.0001  |
| AR10          | 0.5662   | 7.23    | <.0001  |
| AR11          | 0.5644   | 7.32    | <.0001  |
| AR12          | -0.3572  | -4.83   | <.0001  |

The time effect is positive and significant, indicating the urgency to interrupt the trend of increasing cigarette consumption in China to reduce the burden of diseases and death due to smoking.

The parameter estimate shows that GDP growth has a positive and statistically significant impact on monthly cigarette consumption. GDP growth indicates a macro income effect; this effect conforms with the literature that the income elasticity of cigarette consumption is positive.

In terms of the impact of tobacco control policies, implementation of the FCTC in 2006 resulted in an immediate reduction in the number of cigarettes consumed. However, after the initial reduction, consumption again rose over time, indicating that either the tobacco industry developed new strategies to counteract the FCTC policy or consumers resumed the intensity of their smoking habits after the initial reaction to the macro-policy change.

1  
2  
3 Similar to what happened after implementation of the international treaty, when the  
4 CCCPC and the State Council jointly issued a national policy on state employees/officials  
5 and governments in 2013, consumption of cigarettes dropped immediately. The drop  
6 following announcement of the national policy was about three times the drop in  
7 consumption after implementation of the FCTC. Again, similar to what happened after  
8 implementation of the FCTC, the trend after the change in national policy was positive  
9 subsequent to the drop, but not statistically significant. This finding shows that while the  
10 2013 national policy changes aimed at changing cigarette-related social norms could  
11 immediately impact average sales, the after effect was counteracted by either consumer  
12 habits or more aggressive marketing strategies by the tobacco industry.

13  
14  
15  
16  
17  
18  
19  
20  
21  
22  
23  
24  
25  
26 As for China's two tobacco tax initiatives, the coefficient of the Tax 1 (2009) variable is  
27 not statistically significant, as one would have expected. Over time, the tobacco industry  
28 restructured its market share but the magnitude of the coefficient of the time and tax  
29 interaction term is still very small, though statistically significant. However, the  
30 coefficient of the Tax2 (2015) variable and its time trend interaction term are both  
31 statistically significant with a magnitude four times larger than the FCTC effect and 40  
32 percent higher than the national policy effect. As shown from the coefficient and its  
33 interaction term, the 2015 tobacco tax increase (Tax2) essentially reduced per capita  
34 monthly consumption by 0.43 pack initially and then continued to reduce consumption by  
35 0.04 pack per capita per month over time.

36  
37  
38  
39  
40  
41  
42  
43  
44  
45  
46  
47  
48  
49 The implementation of both tax increases (2009 and 2015) resulted in similar initial  
50 effects and time trends. The initial effect of the second (2015) tax increase, aimed at  
51 wholesale and retail prices, was about ten times the initial effect of the 2009 tax increase.

1  
2  
3 The trend effect of the 2015 policy was about four times the trend effect of the first tax  
4 increase. In addition, unmeasured smoke-free model effects might have contributed to the  
5  
6 big impact of the 2015 tax increase.  
7  
8

9  
10 This finding indicates that unless specific policies are targeted at smokers, generalized  
11 policies advocating tobacco control may result in some immediate effects, but they won't  
12  
13 be able to change the consumption of tobacco over time.  
14  
15

16  
17 Tax increases are much more effective at changing tobacco consumption than generalized  
18 policies. This was true of even the first tax increase (in 2009), which was not reflected in  
19  
20 the retail price of cigarettes. When the tax increase was factored into the retail price (in  
21  
22 2015), the impact on cigarette consumption was much larger and was sustained over time.  
23  
24

25  
26 Figure 2 presents China's average monthly packs of cigarettes consumed per capita per  
27 year from 2000-2017 with and without accounting for tobacco control policies. Before  
28  
29 the FCTC policy was implemented, between 2000 and 2005, average consumption  
30  
31 increased from 5.1 packs to 6.3 packs per capita per month, an increase of 23.5% in six  
32  
33 years.  
34  
35

36  
37 Between 2006 and 2013, monthly cigarette consumption grew from 6.4 packs to 7.7  
38  
39 packs, an increase of 20.3% in seven years. Consumption then began to decrease in 2013.  
40  
41 By the end of 2016, the average number of packs of cigarettes consumed monthly had  
42  
43 dropped from 7.7 to 7.2, a 6.5% decrease in three years. Without the tax increase, average  
44  
45 consumption was predicted at 8.6 packs, 16.3% higher than with the tax increase.  
46  
47

48  
49 The 2013 policy announcements by the Chinese national government changed smoking-  
50 related social norms. Combined with the global FCTC intervention and the first tax  
51  
52 increase (2009), the growing trend of cigarette consumption per month per capita in  
53  
54  
55  
56  
57  
58  
59  
60

China finally began to decline, and the second tax increase (2015) had a much bigger impact on the downward trend.

**Insert Figure 2 Here.**

Based on the model estimates, we calculated the total impact of various policies on the average number of packs of cigarettes consumed per month. Table 3 presents the percentage change in average monthly consumption of cigarettes, with and without tobacco control policies. The percentage effect is calculated as follows:

$$\% \text{ Change} = (Y^{\wedge}_{\text{policies}=1} - Y^{\wedge}_{\text{policies}=0}) / Y^{\wedge}_{\text{policies}=0}$$

**Table 3 Impact of tobacco control policies on average monthly cigarette consumption per capita**

| Policy Period           | Predicted Monthly Consumption in Packs of Cigarettes with Policies<br>( $Y^{\wedge}_{\text{policies}=1}$ ) | Predicted Monthly Consumption in Packs of Cigarettes without Policies<br>( $Y^{\wedge}_{\text{policies}=0}$ ) | % Change<br>( $Y^{\wedge}_{\text{policies}=1} - Y^{\wedge}_{\text{policies}=0} / Y^{\wedge}_{\text{policies}=0}$ ) | Incremental Change |
|-------------------------|------------------------------------------------------------------------------------------------------------|---------------------------------------------------------------------------------------------------------------|--------------------------------------------------------------------------------------------------------------------|--------------------|
| No Policies             | 5.680                                                                                                      | 5.680                                                                                                         | 0.00%                                                                                                              | 0.00%              |
| FCTC Only               | 6.737                                                                                                      | 6.754                                                                                                         | -0.25%                                                                                                             | -0.25%             |
| FCTC/Tax1               | 7.450                                                                                                      | 7.566                                                                                                         | -1.54%                                                                                                             | -1.29%             |
| FCTC/Tax1/National      | 7.668                                                                                                      | 8.202                                                                                                         | -6.51%                                                                                                             | -4.97%             |
| FCTC/Tax1/National/Tax2 | 7.176                                                                                                      | 8.598                                                                                                         | -16.54%                                                                                                            | -10.03%            |

Table 3 shows that during the 40-month period when only the FCTC policy was in effect (January 2006 through April 2009), average cigarette consumption dropped 0.25%, due mainly to the initial impact of the FCTC.

During the 54-month period that includes implementation of the FCTC and the first tax increase (May 2009 through October 2013), average consumption dropped 1.54%, and

the incremental effect of the 2009 tax increase was -1.29%, indicating a very limited effect when the tax increase was not factored into the retail price.

During the 18-month period following issuance of the national policies (November 2013 through April 2015), but prior to the second tax increase instituted in May 2015, the average consumption of cigarettes dropped 6.51%, and the national policy changes alone reduced monthly consumption by 4.97%.

After the second tax increase announced in May 2015, a big decline occurred in cigarette consumption. In the 26-month period following this tax increase (May 2015 through June 2017), the average consumption of cigarettes dropped 16.54%, due mainly to the effect of the second tax increase, which alone brought down average monthly consumption by 10.03%.

Table 4 presents the predicted effects of the four policies studied on cigarette consumption measured in million packs.

**Table 4 Impact of tobacco control policies on cigarette consumption in million packs**

| Period               | FCTC  | 1st Taxation | National | 2nd Taxation | All Policies |
|----------------------|-------|--------------|----------|--------------|--------------|
| Jan 2006 to Apr 2009 | 893   | 0            | 0        | 0            | 893          |
| May 2009 to Oct 2013 | 1,377 | 7,106        | 0        | 0            | 8,484        |
| Nov 2013 to Apr 2015 | 505   | 2,606        | 10,042   | 0            | 13,153       |
| May 2015 to Jun 2017 | 771   | 3,980        | 15,336   | 30,949       | 51,036       |
| Total                | 3,547 | 13,693       | 25,377   | 30,949       | 73,567       |

Between January 2006 and June 2017, China consumed 1.348 trillion packs of cigarettes.

The reduction in total consumption attributable to the policy changes was 73.6 billion packs, which is 5.18% of the sales predicted without policy interventions.

Implementation of the FCTC decreased consumption by 3.5 billion packs, the first tax



1  
2  
3 increase (2009) reduced consumption by 13.7 billion, the national policy announcements  
4 decreased it by 25.4 billion packs, and the largest reduction came from the second tax  
5  
6 increase (2015), including unmeasured local smoke-free policies--almost 31 billion packs  
7  
8 in just 26 months.  
9

10  
11  
12 From announcement of the 2013 national policy change through June 2017, China  
13  
14 reduced the sales of cigarettes by 64.2 billion packs, a 12.57% reduction in the average  
15  
16 consumption of cigarettes in China.  
17

## 18 19 **Discussion**

20  
21 The WHO FCTC, an international treaty, aims to provide a roadmap to address the global  
22  
23 tobacco epidemic using effective measures and strategies. China ratified the treaty in  
24  
25 November 2005 and began implementation in January 2006.  
26  
27

28  
29 Calculated from Table 3, this study finds that the impact of national policy changes has  
30  
31 been almost 20 times larger than the impact of the WHO FCTC treaty itself, and that  
32  
33 national tobacco control policy changes in China have been a determining factor in  
34  
35 reversing the increasing trend of tobacco consumption. In other words, implementing an  
36  
37 international treaty requires national policy change to achieve the goal of reducing  
38  
39 tobacco consumption. Ratification of the treaty alone without domestic policy  
40  
41 implementation will have a very minimal effect.  
42  
43

44  
45 The process of integrating global policy with domestic policy change took exactly 10  
46  
47 years in China (November 2003 to November 2013).<sup>32</sup> Our study finds that after the  
48  
49 immediate effects of the policy changes were noted, the powerful STMA developed  
50  
51 countermeasures to dilute the impact of the policy changes. This finding confirms the  
52  
53  
54  
55  
56  
57  
58  
59  
60

1  
2  
3 challenges faced by and the persistence required for the global and national tobacco  
4 control communities.<sup>7 33</sup>

5  
6  
7  
8 Between 2006 and 2013, although the government raised the tobacco tax in May 2009,  
9  
10 the economic goal of increasing government revenue overpowered the social goal of  
11 reducing tobacco consumption. The tax increase did not result in higher cigarette prices  
12 for the consumer, thus minimizing the impact of this policy on consumption.<sup>17 34</sup>

13  
14  
15  
16  
17 When the 2015 tax policy raised retail cigarette prices, both immediate and trend effects  
18 were very significant, and the total incremental effect was 7.8 times that of the 2009 tax  
19 increase (the ratio is calculated as the incremental effect of tax2 which is the difference of  
20 FCTC/Tax1/National/Tax2 and FCTC/Tax1/National presented in Table 3: -16.54% and -  
21 6.51%=-10.03%, and the incremental effect of tax1 is the difference of FCTC/Tax1 and  
22 FCTC Only: -1.54% and -0.25%=-1.29%. The ratio of incremental effect tax2 and tax1 is  
23 -10.03% and -1.29%=7.8). This finding indicates that tobacco control policies should be  
24 more robust and target consumers more directly through higher prices and tougher  
25 smoke-free regulations. Because China has no national smoke-free law, and the impact of  
26 various local smoke-free regulations on national cigarette consumption is difficult to  
27 measure, the impact of taxation policy includes unmeasured effects of local smoke-free  
28 policies.  
29  
30  
31  
32  
33  
34  
35  
36  
37  
38  
39  
40  
41  
42  
43

44 This study finds a significant positive income effect on consumption, which indicates that  
45 cigarettes have become more affordable. A recent study shows that between 2001 and  
46 2016, the affordability of cigarettes in China increased 1.85 times. It is important to  
47 continue to raise the tobacco tax to offset the affordability influence on cigarette  
48 consumption.<sup>27</sup>  
49  
50  
51  
52  
53  
54  
55  
56  
57  
58  
59  
60

1  
2  
3 This study shows empirically that raising the tobacco tax through increasing retail prices  
4 is the most effective tobacco control policy instrument among the few policies  
5  
6 implemented in China. Currently China has a relatively low cigarette tax rate, 56% of the  
7  
8 retail price.<sup>20</sup> The WHO guideline for an effective tobacco control benchmark is a tax rate  
9  
10 of 75% of the retail price.<sup>35</sup> Comparing China's tax rate with the WHO guideline reveals  
11  
12 that China has a lot of room to raise its tax on tobacco. Raising the price of cigarettes will  
13  
14 save lives, reduce smoking-related medical costs, and generate additional government  
15  
16 revenue.  
17  
18  
19  
20

21 This study has some limitations. During the study period, the social norm of smoking in  
22  
23 China has changed significantly because of the tobacco control policy changes and  
24  
25 increased awareness of the negative health effects of smoking. This change in the social  
26  
27 norm has not been incorporated into the model estimates. In addition, the cigarette  
28  
29 consumption data are based on wholesale data rather than retail data. However, because  
30  
31 the study is based on time series monthly data, and the retailers are normally not holding  
32  
33 a large inventory, the impact of this data source on the findings is limited.  
34  
35  
36  
37  
38  
39

#### 40 **Contributorship statement**

41  
42 Xiaoxin Xu: Conducted literature review, participated in data collection and manuscript  
43  
44 writing; Xiulan Zhang: Directed and verified data collection, estimated the models and  
45  
46 drafted the findings of the models and the discussions; Teh-wei Hu: Reviewed the models  
47  
48 and findings, participated in writing and discussions; Leonard S. Miller: Reviewed the  
49  
50 models and findings, participated in drafting the main findings of the models; and  
51  
52  
53  
54  
55  
56  
57  
58  
59  
60

1  
2  
3 Mengnan Xu: Participated in data collection and verification, participated in literature  
4 review.  
5  
6

### 7 8 **Competing Interest** 9

10 The authors declare that they have no competing interests.  
11  
12

### 13 **Funding** 14

15 Bill & Melinda Gates Foundation  
16  
17

#### 18 *Role of the funding source* 19

20  
21 The funder had no role in the study design, collection, analysis, or interpretation of the  
22 data, writing the manuscript, or the decision to submit the paper for publication. The  
23 corresponding author had full access to all data in the study and had final responsibility  
24 for the decision to submit for publication.  
25  
26  
27  
28  
29

### 30 **Data sharing statement** 31

32 Extra data is available by emailing Xiulan Zhang.  
33  
34

### 35 **Acknowledgement** 36

37 The authors would like to thank Ms. D. Lynne Kaltreider for her proofreading of the  
38 manuscript.  
39  
40  
41  
42  
43  
44  
45  
46

### 47 **References** 48

- 49 1. The Bill China Cannot Afford: Health, Economic and Social Costs of China's Tobacco  
50 Epidemic. Manila: World Health Organization Regional Office for the Western  
51 Pacific, 2017.  
52  
53  
54  
55  
56  
57  
58  
59  
60

- 1  
2  
3 2. Chen Z, Peto R, Zhou M, et al. Contrasting male and female trends in tobacco-  
4 attributed mortality in China: evidence from successive nationwide prospective  
5 cohort studies. *The Lancet* 2015;386(10002):1447-56. doi:  
6  
7 [https://doi.org/10.1016/S0140-6736\(15\)00340-2](https://doi.org/10.1016/S0140-6736(15)00340-2)  
8  
9
- 10 3. Development of China's tobacco industry in 2000 (in Chinese). *China Tobacco*  
11 2001(4)
- 12 4. Analysis of China's tobacco market in 2016 (in Chinese). *China Tobacco* 2017(5):62-  
13 65.
- 14 5. Yang G. Introduction: China and the Negotiation of WHO FCTC. In: Yang G, ed.  
15 Tobacco control in China. Singapore: Springer 2018:1-16
- 16 6. Huang J. Public interest litigation and tobacco control in China. In: Yang G, ed.  
17 Tobacco control in China. Singapore: Springer 2018:119-40
- 18 7. Xiao D, Bai C-X, Chen Z-M, et al. Implementation of the World Health Organization  
19 Framework Convention on Tobacco Control in China: An arduous and long-term  
20 task. *Cancer* 2015;121(S17):3061-68. doi: <https://doi.org/10.1002/ncr.29608>
- 21 8. Yang G, Wang Y, Wu Y, et al. The road to effective tobacco control in China. *The*  
22 *Lancet* 2015;385(9972):1019-28. doi: [https://doi.org/10.1016/S0140-](https://doi.org/10.1016/S0140-6736(15)60174-X)  
23 [6736\(15\)60174-X](https://doi.org/10.1016/S0140-6736(15)60174-X)
- 24 9. Chen MH. Economic concerns hamper tobacco control in China. *The Lancet*  
25 2007;370(9589):729-30. doi: [http://doi.org/10.1016/S0140-6736\(07\)61359-2](http://doi.org/10.1016/S0140-6736(07)61359-2)
- 26 10. Clarke H, Tan BJ. Tobacco Use Control Policies in China. *Economic Papers: A*  
27 *Journal of Applied Economics and Policy* 2011;30(4):490-96. doi:  
28 <https://doi.org/10.1111/j.1759-3441.2011.00132.x>
- 29 11. Pratt CB. China's tobacco industry's communication practices: Paradoxes and  
30 proposals for public policymaking. *Public Relations Review* 2011;37(3):318-20.  
31 doi: <https://doi.org/10.1016/j.pubrev.2011.03.010>
- 32 12. Huang Y. China's position in negotiating the Framework Convention on Tobacco  
33 Control and the revised International Health Regulations. *Public Health*  
34 2014;128(2):161-66. doi: <https://doi.org/10.1016/j.puhe.2013.08.003>
- 35  
36  
37  
38  
39  
40  
41  
42  
43  
44  
45  
46  
47  
48  
49  
50  
51  
52  
53  
54  
55  
56  
57  
58  
59  
60

- 1  
2  
3 13. Jin J. Why FCTC Policies Have Not Been Implemented in China: Domestic  
4 Dynamics and Tobacco Governance. *Journal of Health Politics, Policy and Law*  
5 2014;39(3):633-66. doi: <https://doi.org/10.1215/03616878-2682630>  
6  
7  
8 14. Zheng R, Gao S, Hu T-W. Tobacco Tax and Tobacco Control: Global Experience and  
9 Its application in China (in Chinese). *Finance & Trade Economics* 2013;34(3):44-  
10 53.  
11  
12  
13 15. Ministry of Finance, State Administration of Taxation. Notice on Adjustment to  
14 Excise Tax on Tobacco Products(Taxation Document No.2009-84)(in Chinese),  
15 2009.  
16  
17  
18 16. Hu T-w, Mao Z, Shi J. Recent tobacco tax rate adjustment and its potential impact on  
19 tobacco control in China. *Tobacco Control* 2010;19(1):80-82. doi:  
20 <http://dx.doi.org/10.1136/tc.2009.032631>  
21  
22  
23 17. Shi J, Hu T-w, Mao Z. Economic Effect Analysis of China's Tobacco Excise Tax  
24 Reform(in Chinese). *Review on Finance and Economics* 2011(1):52-59.  
25  
26  
27 18. Gao S, Zheng R, Hu T-w. Can increases in the cigarette tax rate be linked to cigarette  
28 retail prices? Solving mysteries related to the cigarette pricing mechanism in  
29 China. *Tobacco Control* 2012;21(6):560-62. doi:  
30 <http://dx.doi.org/10.1136/tobaccocontrol-2011-050027>  
31  
32  
33 19. Ministry of Finance. Overview of China's fiscal revenue and expenditure in April  
34 2009 (in Chinese) Beijing: Ministry of Finance of the People's Republic of China;  
35 2009 [Available from:  
36 [http://gks.mof.gov.cn/zhengfuxinxi/tongjishuju/200905/t20090514\\_157614.html](http://gks.mof.gov.cn/zhengfuxinxi/tongjishuju/200905/t20090514_157614.html)  
37  
38  
39 accessed March 27 2019.  
40  
41  
42 20. Hu T-w, Zhang X, Zheng R. China has raised the tax on cigarettes: what's next?  
43 *Tobacco Control* 2015;25(6):609-11. doi:  
44 <http://dx.doi.org/10.1136/tobaccocontrol-2015-052534>  
45  
46  
47 21. Zheng R, Wang Y, Hu X. Tobacco tax: theory, system design, and policy practice (in  
48 Chinese). *Financial Minds* 2016;1(6):5-30.  
49  
50  
51 22. Mackay J. China: the tipping point in tobacco control. *British Medical Bulletin*  
52 2016;120(1):15-25. doi: <https://doi.org/10.1093/bmb/ldw043>  
53  
54  
55  
56  
57  
58  
59  
60

- 1  
2  
3 23. Alcorn T. Winds shift for tobacco control in China. *The Lancet Respiratory Medicine*  
4 2013;1(9):679-80. doi: [Http://doi.org/10.1016/S2213-2600\(13\)70236-4](http://doi.org/10.1016/S2213-2600(13)70236-4)  
5  
6  
7 24. Wedeman A. Xi Jinping's hunt: Anti-corruption campaign or factional purge? *Modern*  
8 *China Studies* 2017;24(2):35-94.  
9  
10 25. World Bank. World Development Report 2012 : Gender Equality and Development.  
11 Washington, DC: The World Bank Group, 2012.  
12  
13 26. Wang L, Yan Y, Yi N, et al. Cigarette consumer price and affordability in China:  
14 results from 2015 China adult survey (in Chinese). *Chinese Journal of*  
15 *Epidemiology* 2017;38(1):69-72.  
16  
17 27. Zheng R, Wang Y, Hu X, et al. Cigarette affordability in China: 2001-2016.  
18 Washington, DC.: World Bank, 2017.  
19  
20 28. Hu T-w, Sung H-Y, Keeler TE. Reducing cigarette consumption in California:  
21 tobacco taxes vs an anti-smoking media campaign. *American Journal of Public*  
22 *Health* 1995;85(9):1218-22. doi: [Http://doi.org/10.2105/ajph.85.9.1218](http://doi.org/10.2105/ajph.85.9.1218)  
23  
24 29. McDowall D, McCleary R, Meidinger EE, et al. Interrupted Time Series Analysis.  
25 Thousand Oaks, CA: Sage Publications, Inc 1980.  
26  
27 30. Wagner AK, Soumerai SB, Zhang F, et al. Segmented regression analysis of  
28 interrupted time series studies in medication use research. *Journal of Clinical*  
29 *Pharmacy and Therapeutics* 2002;27(4):299-309. doi:  
30 [Http://doi.org/10.1046/j.1365-2710.2002.00430.x](http://doi.org/10.1046/j.1365-2710.2002.00430.x)  
31  
32 31. Zombré D, De Allegri M, Ridde V. Immediate and sustained effects of user fee  
33 exemption on healthcare utilization among children under five in Burkina Faso: A  
34 controlled interrupted time-series analysis. *Social Science & Medicine*  
35 2017;179(Supplement C):27-35. doi:  
36 <https://doi.org/10.1016/j.socscimed.2017.02.027>  
37  
38 32. Eight years' implementation of World Health Organization Framework Convention on  
39 Tobacco Control(in Chinese) 2013 [Available from:  
40 [http://www.chinacdc.cn/jkzt/jkcj/sthd\\_3844/slhd\\_4153/201305/t20130515\\_80977](http://www.chinacdc.cn/jkzt/jkcj/sthd_3844/slhd_4153/201305/t20130515_80977)  
41 [.htm](http://www.chinacdc.cn/jkzt/jkcj/sthd_3844/slhd_4153/201305/t20130515_80977) accessed 12-31 2017.  
42  
43  
44  
45  
46  
47  
48  
49  
50  
51  
52  
53  
54  
55  
56  
57  
58  
59  
60

- 1  
2  
3 33. Hu T-w, Lee AH, Mao Z. WHO Framework Convention on Tobacco Control in  
4 China: Barriers, challenges and recommendations. *Global Health Promotion*  
5 2013;20(4):13-22. doi: [Http://doi.org/10.1177/1757975913501910](http://doi.org/10.1177/1757975913501910)  
6  
7  
8 34. Gao S, Zheng R. Price, tax and cigarette smoking: Simulations of China's tobacco tax  
9 policy. *Frontiers of Economics in China* 2012;7(4):604-26.  
10  
11 35. World Health Organization. WHO Technical Manual on Tobacco Tax  
12 Administration. Geneva, Switzerland: World Health Organization, 2010.  
13  
14  
15  
16  
17  
18  
19  
20  
21  
22  
23  
24  
25  
26  
27  
28  
29  
30  
31  
32  
33  
34  
35  
36  
37  
38  
39  
40  
41  
42  
43  
44  
45  
46  
47  
48  
49  
50  
51  
52  
53  
54  
55  
56  
57  
58  
59  
60



1  
2  
3  
4  
5  
6  
7  
8  
9  
10  
11  
12  
13  
14  
15  
16  
17  
18  
19  
20  
21  
22  
23  
24  
25  
26  
27  
28  
29  
30  
31  
32  
33  
34  
35  
36  
37  
38  
39  
40  
41  
42  
43  
44  
45  
46  
47  
48  
49  
50  
51  
52  
53  
54  
55  
56  
57  
58  
59  
60

**Figure 1 Timeline of tobacco control policies in China**

For peer review only

1  
2  
3 **Figure 2 Estimated monthly average packs of cigarettes consumed in China per**  
4 **capita with and without accounting for tobacco control policies, 2000-2017. Dotted**  
5 **red line (without policy), trend without tobacco control policies; Blue line(with**  
6 **policy), trend with tobacco control policies. Both lines are predicted values from the**  
7 **time-series model parameters.**  
8  
9  
10  
11  
12  
13  
14  
15  
16  
17  
18  
19  
20  
21  
22  
23  
24  
25  
26  
27  
28  
29  
30  
31  
32  
33  
34  
35  
36  
37  
38  
39  
40  
41  
42  
43  
44  
45  
46  
47  
48  
49  
50  
51  
52  
53  
54  
55  
56  
57  
58  
59  
60

For peer review only

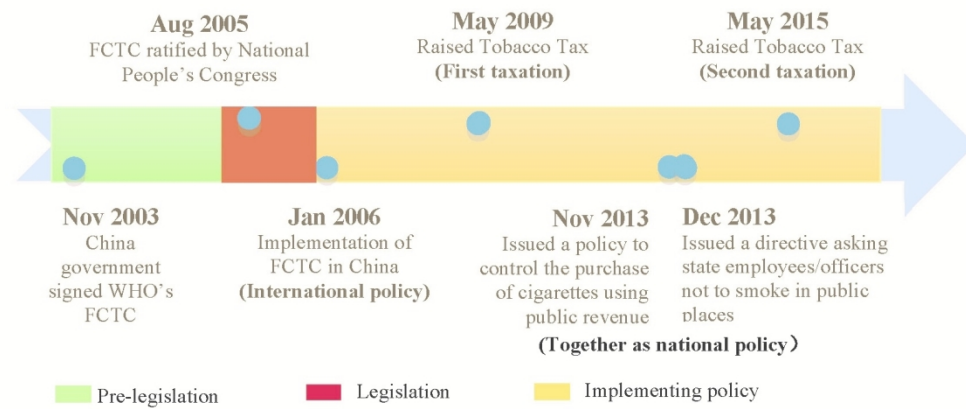

Figure 1 Timeline of tobacco control policies in China

461x196mm (96 x 96 DPI)

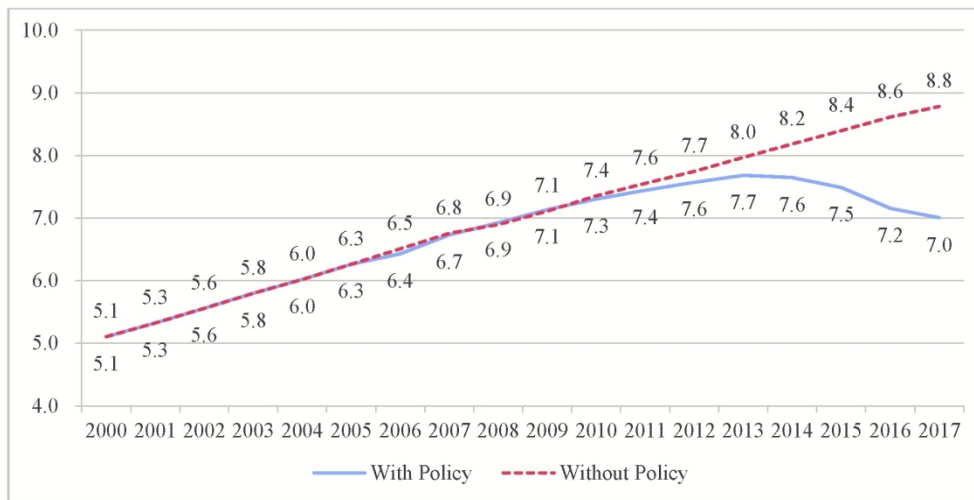

Figure 2 Estimated monthly average packs of cigarettes consumed in China per capita with and without accounting for tobacco control policies, 2000-2017. Dotted red line (without policy), trend without tobacco control policies; Blue line(with policy), trend with tobacco control policies. Both lines are predicted values from the time-series model parameters.

546x284mm (96 x 96 DPI)

1  
2  
3  
4  
5  
6  
7  
8  
9  
10  
11  
12  
13  
14  
15  
16  
17  
18  
19  
20  
21  
22  
23  
24  
25  
26  
27  
28  
29  
30  
31  
32  
33  
34  
35  
36  
37  
38  
39  
40  
41  
42  
43  
44  
45  
46  
47  
48  
49  
50  
51  
52  
53  
54  
55  
56  
57  
58  
59  
60

STROBE Statement—checklist of items that should be included in reports of observational studies  
(Shown in form of a/b, a means page number, and b means line number; n/a means not applicable.)

|                              | Item No | Recommendation                                                                                                                                                                                                                                                                                                                                                                                                                                                                                                                                                                                                                                                                                                            |
|------------------------------|---------|---------------------------------------------------------------------------------------------------------------------------------------------------------------------------------------------------------------------------------------------------------------------------------------------------------------------------------------------------------------------------------------------------------------------------------------------------------------------------------------------------------------------------------------------------------------------------------------------------------------------------------------------------------------------------------------------------------------------------|
| <b>Title and abstract</b>    | 1       | (a) Indicate the study's design with a commonly used term in the title or the abstract ( 1/4-7, 3/15-33 )<br>(b) Provide in the abstract an informative and balanced summary of what was done and what was found(3/35-52&4/3-6)                                                                                                                                                                                                                                                                                                                                                                                                                                                                                           |
| <b>Introduction</b>          |         |                                                                                                                                                                                                                                                                                                                                                                                                                                                                                                                                                                                                                                                                                                                           |
| Background/rationale         | 2       | Explain the scientific background and rationale for the investigation being reported(6/24-8/22)                                                                                                                                                                                                                                                                                                                                                                                                                                                                                                                                                                                                                           |
| Objectives                   | 3       | State specific objectives, including any prespecified hypotheses(8/24-38)                                                                                                                                                                                                                                                                                                                                                                                                                                                                                                                                                                                                                                                 |
| <b>Methods</b>               |         |                                                                                                                                                                                                                                                                                                                                                                                                                                                                                                                                                                                                                                                                                                                           |
| Study design                 | 4       | Present key elements of study design early in the paper (n/a)                                                                                                                                                                                                                                                                                                                                                                                                                                                                                                                                                                                                                                                             |
| Setting                      | 5       | Describe the setting, locations, and relevant dates, including periods of recruitment, exposure, follow-up, and data collection(n/a)                                                                                                                                                                                                                                                                                                                                                                                                                                                                                                                                                                                      |
| Participants                 | 6       | (a) <i>Cohort study</i> —Give the eligibility criteria, and the sources and methods of selection of participants. Describe methods of follow-up(n/a)<br><i>Case-control study</i> —Give the eligibility criteria, and the sources and methods of case ascertainment and control selection. Give the rationale for the choice of cases and controls(n/a)<br><i>Cross-sectional study</i> —Give the eligibility criteria, and the sources and methods of selection of participants(n/a)<br>(b) <i>Cohort study</i> —For matched studies, give matching criteria and number of exposed and unexposed(n/a)<br><i>Case-control study</i> —For matched studies, give matching criteria and the number of controls per case(n/a) |
| Variables                    | 7       | Clearly define all outcomes, exposures, predictors, potential confounders, and effect modifiers. Give diagnostic criteria, if applicable(8/45-10/39)                                                                                                                                                                                                                                                                                                                                                                                                                                                                                                                                                                      |
| Data sources/<br>measurement | 8*      | For each variable of interest, give sources of data and details of methods of assessment (measurement). Describe comparability of assessment methods if there is more than one group(8/45-10/13)                                                                                                                                                                                                                                                                                                                                                                                                                                                                                                                          |
| Bias                         | 9       | Describe any efforts to address potential sources of bias(n/a)                                                                                                                                                                                                                                                                                                                                                                                                                                                                                                                                                                                                                                                            |
| Study size                   | 10      | Explain how the study size was arrived at(n/a)                                                                                                                                                                                                                                                                                                                                                                                                                                                                                                                                                                                                                                                                            |
| Quantitative variables       | 11      | Explain how quantitative variables were handled in the analyses. If applicable, describe which groupings were chosen and why(8/45-9/17)                                                                                                                                                                                                                                                                                                                                                                                                                                                                                                                                                                                   |
| Statistical methods          | 12      | (a) Describe all statistical methods, including those used to control for confounding(10/48-11/24)<br>(b) Describe any methods used to examine subgroups and interactions(n/a)<br>(c) Explain how missing data were addressed(n/a)<br>(d) <i>Cohort study</i> —If applicable, explain how loss to follow-up was addressed<br><i>Case-control study</i> —If applicable, explain how matching of cases and controls was addressed(n/a)<br><i>Cross-sectional study</i> —If applicable, describe analytical methods taking account of sampling strategy(n/a)<br>(e) Describe any sensitivity analyses(n/a)                                                                                                                   |

Continued on next page

| <b>Results</b>           |     |                                                                                                                                                                                                                                                                                                                                                                                                                                                        |
|--------------------------|-----|--------------------------------------------------------------------------------------------------------------------------------------------------------------------------------------------------------------------------------------------------------------------------------------------------------------------------------------------------------------------------------------------------------------------------------------------------------|
| Participants             | 13* | (a) Report numbers of individuals at each stage of study—eg numbers potentially eligible, examined for eligibility, confirmed eligible, included in the study, completing follow-up, and analysed(n/a)<br>(b) Give reasons for non-participation at each stage(n/a)<br>(c) Consider use of a flow diagram(n/a)                                                                                                                                         |
| Descriptive data         | 14* | (a) Give characteristics of study participants (eg demographic, clinical, social) and information on exposures and potential confounders(n/a)<br>(b) Indicate number of participants with missing data for each variable of interest(n/a)<br>(c) <i>Cohort study</i> —Summarise follow-up time (eg, average and total amount)(n/a)                                                                                                                     |
| Outcome data             | 15* | <i>Cohort study</i> —Report numbers of outcome events or summary measures over time(n/a)<br><i>Case-control study</i> —Report numbers in each exposure category, or summary measures of exposure(n/a)<br><i>Cross-sectional study</i> —Report numbers of outcome events or summary measures(n/a)                                                                                                                                                       |
| Main results             | 16  | (a) Give unadjusted estimates and, if applicable, confounder-adjusted estimates and their precision (eg, 95% confidence interval). Make clear which confounders were adjusted for and why they were included(11/38-12/23, 15/26-42)<br>(b) Report category boundaries when continuous variables were categorized(n/a)<br>(c) If relevant, consider translating estimates of relative risk into absolute risk for a meaningful time period(16/33-17/18) |
| Other analyses           | 17  | Report other analyses done—eg analyses of subgroups and interactions, and sensitivity analyses(n/a)                                                                                                                                                                                                                                                                                                                                                    |
| <b>Discussion</b>        |     |                                                                                                                                                                                                                                                                                                                                                                                                                                                        |
| Key results              | 18  | Summarise key results with reference to study objectives(17/22-43)                                                                                                                                                                                                                                                                                                                                                                                     |
| Limitations              | 19  | Discuss limitations of the study, taking into account sources of potential bias or imprecision. Discuss both direction and magnitude of any potential bias(19/22-31)                                                                                                                                                                                                                                                                                   |
| Interpretation           | 20  | Give a cautious overall interpretation of results considering objectives, limitations, multiplicity of analyses, results from similar studies, and other relevant evidence(17/45-19/20)                                                                                                                                                                                                                                                                |
| Generalisability         | 21  | Discuss the generalisability (external validity) of the study results(n/a)                                                                                                                                                                                                                                                                                                                                                                             |
| <b>Other information</b> |     |                                                                                                                                                                                                                                                                                                                                                                                                                                                        |
| Funding                  | 22  | Give the source of funding and the role of the funders for the present study and, if applicable, for the original study on which the present article is based(20/9-21)                                                                                                                                                                                                                                                                                 |

\*Give information separately for cases and controls in case-control studies and, if applicable, for exposed and unexposed groups in cohort and cross-sectional studies.

**Note:** An Explanation and Elaboration article discusses each checklist item and gives methodological background and published examples of transparent reporting. The STROBE checklist is best used in conjunction with this article (freely available on the Web sites of PLoS Medicine at <http://www.plosmedicine.org/>, Annals of Internal Medicine at <http://www.annals.org/>, and Epidemiology at <http://www.epidem.com/>). Information on the STROBE Initiative is available at [www.strobe-statement.org](http://www.strobe-statement.org).
